1 **Global geographic patterns of sexual size dimorphism in birds: Support for**  
2 **a latitudinal trend?**

3  
4  
5  
6  
7 **Nicholas R. Friedman<sup>1,2</sup> and Vladimír Remeš<sup>1,3</sup>**

8  
9 <sup>1</sup> Department of Zoology and Laboratory of Ornithology, Faculty of Science, Palacký  
10 University, 17. listopadu 50, 77146 Olomouc, Czech Republic

11 <sup>2</sup> [nicholas.friedman@upol.cz](mailto:nicholas.friedman@upol.cz)

12 <sup>3</sup> [vladimir.remes@upol.cz](mailto:vladimir.remes@upol.cz)

13  
14  
15  
16 **Corresponding Author:** Nicholas R. Friedman

17

1 **Abstract**

2 Sexual size dimorphism (SSD) is widespread among animals, and is a common indication of  
3 differential selection among males and females. Sexual selection theory predicts that SSD  
4 should increase as one sex competes more fiercely for access to mates, but it is unclear what  
5 effect spatial variation in ecology may have on this behavioral process. Here, we examine  
6 SSD across the class Aves in a spatial and phylogenetic framework, and test several a priori  
7 hypotheses regarding its relationship with climate. We mapped the global distribution of SSD  
8 from published descriptions of body size, distribution, and phylogenetic relationships across  
9 2581 species of birds. We examined correlations between SSD and nine predictor variables  
10 representing a priori models of physical geography, climate, and climate variability. Our  
11 results show guarded support for a global latitudinal trend in SSD based on a weak  
12 prevalence of species with low or female-biased SSD in the North, but substantial spatial  
13 heterogeneity. While several stronger relationships were observed between SSD and climate  
14 predictors within zoogeographical regions, no global relationship emerged that was  
15 consistent across multiple methods of analysis. While we found support for a global  
16 relationship between climate and SSD, this support lacked consistency and explanatory  
17 power. Furthermore the strong phylogenetic signal and conspicuous lack of support from  
18 phylogenetically corrected analyses suggests that any such relationship in birds is likely due  
19 to the idiosyncratic histories of different lineages. In this manner, our results broadly agree  
20 with studies in other groups, leading us to conclude that the relationship between climate and  
21 SSD is at best complex. This suggests that SSD is linked to behavioral dynamics that may at  
22 a global scale be largely independent of environmental conditions.

## 1 **Introduction**

2  
3 Males and females often differ in their size, coloration, and behavior. Sexual size  
4 dimorphism (SSD) is particularly widespread (Andersson, 1994; Fairbairn *et al.*, 2007), and  
5 varies in magnitude from modest to extreme (e.g., males are up to 210% larger than females  
6 in the Great Bustard, *Otis tarda*), and from male-biased to female-biased (e.g., females are  
7 117% larger than males in the Dapple-throat, *Arcanator orostruthus*, Székely *et al.*, 2007).  
8 Evolutionary biologists have long worked to explain this variation in terms of major selective  
9 forces and to identify its correlates. Theory predicts that in polygamous species, one sex  
10 should compete more fiercely for access to mates, and thus be selected to develop greater  
11 body size to increase its competitiveness in contests (Andersson, 1994). Mating system has  
12 emerged as the most robust and important correlate of SSD in both birds and mammals, with  
13 polygynous species exhibiting high SSD (Clutton-Brock *et al.*, 1977; Payne, 1984; Oakes,  
14 1992; Webster, 1992; Owens & Hartley, 1998; Weckerly, 1998; Dunn *et al.*, 2001;  
15 Lindenfors *et al.*, 2003; Székely *et al.*, 2007; Lislevand *et al.*, 2009). But while many studies  
16 have examined sexual size dimorphism from a comparative or phylogenetic perspective, few  
17 have investigated geographic variation in this trait (Dunn *et al.*, 2001; Cardillo, 2002;  
18 Blanckenhorn *et al.*, 2006; Tamate & Maekawa, 2006).

19 Several hypotheses have been introduced to explain interspecific variation in mating  
20 systems, and could thus help predict global geographic variation in SSD. First, in terms of  
21 mating systems themselves, a classic argument suggests that the occurrence of polygyny  
22 should be related to environmental productivity, although the predicted direction differs  
23 between authors. One such argument is that productive environments might allow for  
24 aggregation of individuals (Verner & Wilson, 1966) and consequently for monopolization of  
25 female groups by males (Clutton-Brock, 1991; Lukas & Clutton-Brock, 2013). However,

1 other researchers have argued that spatial clumping of resources might be more important  
2 (Jarman, 1974) and that homogeneous, highly productive environments should facilitate the  
3 occurrence of social monogamy (Emlen & Oring, 1977). From a temporal perspective,  
4 potential for polygamy is increased by increased temporal availability of mates, although not  
5 by extreme breeding synchrony (Emlen & Oring, 1977). As breeding seasons are shorter  
6 further from the equator, polygyny and SSD should be favored at temperate to higher  
7 latitudes. Moreover, higher variability of climate within the year leading to temporal  
8 clumping of resources might also lead to increased temporal availability of mates. Thus,  
9 polygyny and SSD might be predicted to be higher in more seasonal environments.

10         Second, in terms of the tenure of pair bonds, a classic argument suggests that more  
11 demanding environmental conditions require participation of both sexes in parental care  
12 (Trivers, 1972; Brown *et al.*, 2010; Royle *et al.*, 2012). Such demanding environmental  
13 conditions might include low productivity and low predictability. In line with this reasoning,  
14 it has been shown that environments with low predictability promote cooperation when  
15 raising the brood (Rubenstein & Lovette, 2007; Jetz & Rubenstein, 2011). Longer pair bonds,  
16 in turn, constrain the opportunity for polygamy and biased distribution of matings, and  
17 consequently can limit the evolution of SSD. Moreover, male-biased SSD in environments  
18 with low predictability can be also precluded by stronger sexual and social competition  
19 among females in these environments with resulting lower SSD (Clutton-Brock *et al.*, 2006;  
20 Rubenstein & Lovette, 2009).

21         Although sexual selection is a major influence on SSD, other hypotheses can be also  
22 useful for predicting global geographic trends in this trait. Body mass is a key adaptation of  
23 an organism to its environment, due to fundamental scaling of energetics with mass.  
24 Consequently, body mass often strongly varies with geography or environmental conditions  
25 (e.g., Bergmann's rule; Blanckenhorn *et al.*, 2006). If larger size of males requires more

1 energy for self-maintenance during both growth (Benito & Gonzáles-Solís, 2007; Jones *et*  
2 *al.*, 2009) and adulthood, males can suffer from higher mortality during times of shortage  
3 (Wikelski & Trillmich, 1997). Similarly, the evolution of particularly large males can be  
4 prevented in environments with stiff and chronic resource competition, e.g. on islands (Raia  
5 & Meiri, 2006). Chronic resource shortages (low productivity) or frequent ones (low  
6 predictability) in harsh environments would thus select against large males, opposing sexual  
7 selection and preventing the evolution of extensive SSD. Consequently, we suggest that  
8 harsh environments would select against divergence in size between sexes and thus lead to  
9 low SSD.

10         Although there have been many attempts to link mating system to ecology (Crook,  
11 1964; Verner & Wilson, 1966; Jarman, 1974; Emlen & Oring, 1977; Owens & Bennett,  
12 1997; Pérez-Barbería *et al.*, 2002), these were usually small-scale due to limitations in data  
13 availability (but see Lukas & Clutton-Brock, 2013). One previous study, conducted across 80  
14 bird species, found no relationship between SSD and latitude after correcting for phylogeny  
15 (Cardillo, 2002). Since then, no one has yet exploited the well-established link between  
16 mating system and SSD to examine patterns of sexual selection in relation to geography,  
17 environment, and phylogeny at a global scale. Here, we make such an attempt on a large  
18 clade of animals by analyzing global variation in SSD in 2581 species of birds. We use data  
19 on SSD and environmental conditions, incorporating both geographic (species distributions)  
20 and phylogeny-based approaches, to test the following hypotheses. 1) SSD will be higher i)  
21 in temperate latitudes, where short breeding seasons should lead to intense competition for  
22 mates, and ii) in more seasonal environments, where breeding is temporarily clumped leading  
23 to stronger male-male competition. 2) SSD will be correlated with environmental  
24 productivity, either positively (clumping and consequent monopolization of females by males  
25 and/or freeing males from parental duties) or negatively (spread of biparental units across

1 homogeneous, productive environment). 3) SSD will be lower in harsh (more variable, less  
2 predictable) environments, because these environments i) select against divergence in size  
3 between sexes, and ii) require parental cooperation in raising offspring and consequently lead  
4 to longer pair bonds, less biased distribution of matings, and lower competition for mates.

5

## 6 **Methods**

### 7 *Species Distribution and Bioclimatic Data*

8 We used distribution maps for bird species sampled in this study from the BirdLife  
9 International and NatureServe (2011) database, supplemented by those of Ridgely *et al.*,  
10 (2011). For use in all spatial analyses described here and below, we constructed a cylindrical  
11 equal-area projection grid with a cell area equivalent to 1° x 1° in QGIS (Brodzik & Knowles,  
12 2002; QGIS Development Team, 2013). We overlaid polygonal range maps for each species  
13 onto this grid using Spatial Analysis in Macroecology (SAM; Rangel *et al.*, 2010) to generate  
14 gridded presence/absence and richness data. Grid cells were excluded if they did not include  
15 any landmasses, or if less than two species were present.

16 We chose eight bioclimatic and three geographic variables to represent our a priori  
17 hypotheses for causes of global variation in the magnitude of SSD. Of these, we derived  
18 altitude, temperature, precipitation, within-year variation in temperature, and within-year  
19 variation in precipitation from Hijmans *et al.* (2005), while deriving among-year variation in  
20 both temperature and precipitation from Harris *et al.* (2013). For each of these predictor  
21 variables, we used SAM to convert their raster data into gridded data for each cell in the  
22 global grid. Following an exploratory principle components analysis, we excluded the use of  
23 actual evapotranspiration and net primary productivity, as they were closely correlated with  
24 precipitation (Fig. S1). We combined the remaining nine predictor variables into four major  
25 models: 1) Geographic, 2) Average Climate, 3) Within-Year Climate Variation, 4) Among-

1 Year Climate Variation (see Table 1). While these variables and models are in some cases  
2 correlated (Fig. S2), they describe different aspects of an area's climate and biology that we  
3 are attempting to model in this study. For each chosen predictor variable, we used SAM to  
4 convert the raster data into gridded data for each cell.

5

### 6 *Sexual Size Dimorphism*

7 We used data on body size for males and females from Lislevand *et al.* (2007). This  
8 dataset included measurements for both sexes across 2581 species that matched taxonomic  
9 descriptions in both the species distribution and phylogenetic data. We included data from  
10 each of these species in our analysis, which represents roughly a quarter of all bird species  
11 described. To describe sexual dimorphism for each species, we calculated a Sexual  
12 Dimorphism Index (SDI) following its description in Lovich & Gibbons (1992). This index is  
13 favored as a descriptor of sexual dimorphism for comparative studies (Fairbairn, 2007;  
14 Remeš & Székely, 2010). We calculated SDI as the ratio of the larger sex to the smaller sex,  
15 minus 1, making the value positive when males are larger. This differs slightly from the  
16 original SDI of Lovich & Gibbons (1992), which makes the value positive when females are  
17 larger. This was a deliberate choice on our part to make our sexual dimorphism scores  
18 intuitively interpretable as a proxy for the strength of sexual selection on males. Our  
19 reasoning is that the environmental underpinnings of polygyny are well understood, whereas  
20 those of polyandry are not (Liker *et al.*, 2013 and refs. therein). For our geographic  
21 comparisons of SDI to environmental variables, we used SAM to take the mean of the SDI  
22 values for all species present in each grid cell (Mean SDI).

23

### 24 *Macroecological and Phylogenetic Analyses*

25 We used two main approaches to test for a relationship between environmental

1 predictors and sexual size dimorphism: 1) comparison of global grid cells, each assigned the  
2 average SDI of bird species inhabiting it, and 2) comparison across species using  
3 phylogenetic comparative methods. As recommended by Blackburn & Gaston (1998), we  
4 attempted to account for variation in sampling, spatial autocorrelation, and phylogenetic non-  
5 independence. Throughout these analyses, we used an information theoretic model selection  
6 approach (Anderson, 2008), which is commonly applied to macroecological studies of this  
7 type (e.g., Jetz & Rubenstein, 2011).

8         For our comparison across a global grid, we used spatial autoregression (SAR) as  
9 implemented in *GeoDa* (Anselin *et al.*, 2006). Using a spatial weights grid produced with  
10 eight queen neighbors, we fit each predictor variable to Mean SDI independently, as well as a  
11 single model containing all predictor variables. We also fit weighted least squares (WLS)  
12 models to the spatial distribution of Mean SDI in *R*; these were weighted by the proportion of  
13 avian species in each grid cell for which we had data on SSD (Lislevand *et al.*, 2007; R Core  
14 Team, 2013). To assess spatial variation in the direction and strength of environmental  
15 predictors of SDI, we ran SAR and WLS analyses separately for major zoogeographical  
16 regions identified by Holt *et al.* (2013). To test for an effect of environmental conditions  
17 present only at species' breeding sites on SSD, we repeated these spatial analyses excluding  
18 the non-breeding range of all migratory species.

19         To assign climatic variables to each species for our phylogenetic comparative  
20 analyses, we took the mean value of each climate variable across all grid cells occupied by a  
21 species. We also calculated the median latitude and the absolute value of the median latitude  
22 for each species. We then combined these data with a phylogeny based on the supertree of all  
23 extant birds (Jetz *et al.*, 2012), which we pruned to match our dataset. As there is  
24 considerable uncertainty relating to the topology of this supertree, we repeated the analyses  
25 described below across 100 trees sampled from the posterior distribution of the Hackett-



1 based topology (Hackett *et al.*, 2008). To account for phylogenetic autocorrelation, we  
2 performed Phylogenetic Generalized Least Squares (PGLS) analyses on each predictor and  
3 model, as implemented under an estimated lambda model in a script accompanying  
4 Freckleton (2012), which was kindly adapted by R. Freckleton to work with the current  
5 version of the *ape* package of *R* (Version 3.0-8; Paradis *et al.*, 2004; R Core Team, 2013).  
6 We used the *geiger* package in *R* for estimations of Pagel's lambda and disparity-through-  
7 time plots, as well as several custom scripts written in *R* available upon request (Pagel, 1999;  
8 Harmon *et al.*, 2008).

9         There is a widely observed relationship between body mass and SSD, which is  
10 referred to as Rensch's rule (Rensch, 1950; see Fairbairn *et al.*, 2007). To correct for the  
11 effects of body mass on mean SDI, we repeated the analyses described above with body mass  
12 (species or grid cell average) included as a predictor variable.

13

## 14 **Results**

15

### 16 *Global Patterns*

17

18         Mean SDI varied considerably across the globe, with the most extreme regions  
19 ranging between -0.315 (females 31.5% larger on average) and 0.122 (males 12.2% larger).

20 The highest degrees of SDI appear to be concentrated in areas of high breeding season  
21 productivity, such as northeastern Asia, the Neotropics, and Central Africa (Fig. 1A).

22 Curiously however, high SDI values were also observed in regions with low biological  
23 productivity such as the Horn of Africa, the Arabian Desert, and the Sahel. Generally, SDI  
24 was negatively correlated with latitude (WLS:  $R^2 = 0.06$ ; Fig. 2A). While this linear  
25 relationship has a shallow slope, its implications are quite profound: birds in the global south  
26 are predicted to exhibit roughly twice as much male-biased SSD as birds in the global north.

27

1 *Environmental Predictors*

2

3

4

5

6

7

8

9

10

11

12

13

14

15

16

17

18

19

20

21

22

23

24

25

26

We found statistically significant correlations between all of our environmental predictors and mean SDI at the global scale; these correlations all remained significant when correcting for sampling bias and spatial autocorrelation, but not for phylogenetic non-independence (all univariate predictors were non-significant, and climate predictability was marginally non-significant; Table 1). However, there was considerable variation in the relative fit of each model depending on the type of analysis used. Among univariate models weighted for sampling bias (WLS), latitude best explained geographic variation in SDI (Table 1), with a negative relationship observed between these two variables (Fig. 1C). Among multivariate models tested, a geographic model that included absolute latitude and altitude was the strongest predictor of SDI using WLS ( $R^2 = 0.05$ ; Table 1). This suggests that birds living far from the equator or at high altitudes exhibit smaller male-biased sexual size dimorphism (Fig. 1C).

Correcting for spatial autocorrelation, among-year variation in temperature best explained geographic variation in SDI (Table 1; Figure 2B) with a positive relationship observed between these two variables. This suggests that, counter to our expectations, birds in less predictable environments may exhibit greater degrees of male-biased sexual size dimorphism. While this spatial predictor model explained a considerable amount of variation in the global distribution of SDI (with spatial lag:  $R^2 = 0.35$ ), most of this explanatory power comes from the spatial autocorrelation model (without spatial lag:  $R^2 = 0.007$ ). Correcting for average body mass did not change the rank, direction, or significance of the relationships described above (Table S1). Eliminating non-breeding portions of migratory species' ranges resulted in apparent differences in the global distribution of SDI, particularly in the Neotropics (Fig. S3). However, correlations between breeding SDI and climate predictors behaved similarly to correlations with non-breeding ranges included, particularly in their

1 spatial heterogeneity and strong phylogenetic effect (Table S2).

2 Lastly, in our phylogenetic comparative analysis of variation in SDI among species,  
3 among-year variation in precipitation was the best predictor of SDI. However, this  
4 relationship was very poorly predictive (Table 1; Fig. 2C). We found that the distribution of  
5 SDI among clades strongly followed phylogenetic relationships, as indicated by our high  
6 estimate of Pagel's lambda parameter (Pagel 1999; Figure 3). Using disparity-through-time  
7 plots (Harmon *et al.*, 2003; Figure S4), which show the accumulation of trait disparity among  
8 versus within clades, we found that variation in SDI among clades may have accumulated  
9 early in avian evolution.

## 10 11 *Spatial Heterogeneity*

12  
13 Effects that are observed at regional scales may not be observed globally, and vice  
14 versa. To examine the relationship between climate and SSD at a finer geographic scale, we  
15 repeated our spatial analyses across the zoogeographic regions identified in Holt *et al.*,  
16 (2013). We found a considerable degree of idiosyncrasy among regions in their relationship  
17 between geography, climate, and SDI (Fig. 1C). In most regions, geographic models and  
18 within-year climate variation models best explained variation in SDI (Table S2, Table S3).  
19 Some of these correlations were quite strong, particularly those in the Afrotropic ( $R^2 = 0.40$ ),  
20 Australian ( $R^2 = 0.35$ ), and Sino-Japanese regions ( $R^2 = 0.46$ ). However, there was also  
21 considerable variation in which individual predictor variables best correlated with SDI in  
22 different regions. For example, within-year climate variation best explained variation in SDI  
23 in six out of eleven regions (Table S2), but this relationship was driven by temperature in  
24 three of these regions, and by precipitation in the other three. Similar discordance was  
25 present in the geographic models, with latitude, absolute latitude, and altitude best explaining  
26 variation in SDI within at least one region. While there was occasionally strong support for a

1 relationship between climate and SSD, the differences in model fit among different regions  
2 and analyses demonstrate that this relationship is complex.

### 3 4 **Discussion**

5  
6 Previous studies have investigated geographical and environmental correlates of traits  
7 related to sexual selection, for example song (Botero *et al.*, 2009), plumage dichromatism  
8 (Martin *et al.*, 2010), and extra-pair paternity (Botero & Rubenstein, 2012), with only one  
9 recent study in primates focused on environmental correlates of SSD (Dunham *et al.*, 2013).

10 Here, we conducted a global study investigating the geographic and climatic correlates of  
11 sexual size dimorphism sampling roughly one quarter of extant bird species. We identified  
12 several weak broad-scale geographical and climatic correlates of SSD in birds, but also  
13 substantial effects of geographical heterogeneity, spatial autocorrelation, and phylogeny.

14 Latitude was the most consistent correlate of SSD in birds both globally and within  
15 individual zoogeographic regions, with male-biased SSD increasing from the equator  
16 towards the southern pole and decreasing towards the northern pole (Fig. 1C, Tables S2, S3).  
17 This result directly contradicts our prediction that SSD should be male-biased in more  
18 seasonal northern latitudes. This result suggests a weak but measurable latitudinal gradient in  
19 SSD, but not an immediately satisfying explanation, as latitude correlates with many abiotic  
20 and biotic factors (e.g. Schemske *et al.*, 2009). Our putative explanation is that the difference  
21 between southern and northern hemisphere in SSD is the result of the unique evolutionary  
22 histories of the two avifaunas, as the effect of latitude was much weaker in phylogenetically  
23 controlled analyses (Table 1). However, this is probably not a complete explanation, because  
24 the latitudinal effect was quite consistent across zoogeographic areas (Fig. 1C), which are  
25 largely composed of evolutionarily distinct faunas (Holt *et al.*, 2013).

26 There remained substantial variation around global patterns of SSD in relation to

1 climatic variables (Fig. 1C, also see Table 1), which is usually true even in smaller scale  
2 analyses (e.g., Cox *et al.*, 2003). A multitude of biotic and small-scale environmental factors  
3 were previously hypothesized or demonstrated to correlate with mating systems or SSD.  
4 They include heterogeneity in the quality of territories (Verner & Willson, 1966; Orians,  
5 1969), population density (Lukas & Clutton-Brock, 2013), spatial and temporal clumping of  
6 resources (Emlen & Oring, 1977), prey type (Krüger, 2005; Shreeves & Field, 2008), male  
7 display behaviour (Székely *et al.*, 2000; Serrano-Meneses & Székely, 2006) or breeding in  
8 cooperative groups (Rubenstein & Lovette, 2009). It proved impossible to model effects of  
9 these factors on a global scale. However, here we were interested in global patterns and so  
10 the absence of these factors should not have biased our results.

11         Among zoogeographic regions, within-year variation in climate was a consistent  
12 correlate of SSD (Table S2, S3). However, while some of these local correlations were quite  
13 strong, their direction and best-fitting predictor often differed (Fig. 1C). In northern  
14 temperate regions (Nearctic and Palearctic), SDI increased with within-year climatic  
15 variability. On the contrary, in subtropical and tropical regions (Afrotropical, Oriental, and  
16 Sino-Japanese), SDI decreased with within-year climatic variability (Tables S2 and S3). One  
17 potential explanation might be that in northern temperate regions, high climatic seasonality  
18 leads to temporal clustering of available mates and thus to higher environmental potential for  
19 polygamy. On the other hand, in subtropical and tropical regions, higher environmental  
20 variability might select for cooperative breeding (Rubenstein & Lovette, 2007; Jetz &  
21 Rubenstein, 2011, but see Gonzales *et al.*, 2013), which might lead to less male-biased SSD  
22 due to high intra-sexual competition in females (Clutton-Brock *et al.*, 2006). In accordance  
23 with this hypothesis, cooperative breeding is particularly prevalent in subtropical and tropical  
24 areas (Jetz & Rubenstein 2011).

25         The zoogeographical regions compared in this study represent not only discrete

1 geographical regions, but also phylogenetic clusters (Holt *et al.*, 2013). Thus, heterogeneity  
2 among these categories in their response to environmental predictors also represents  
3 heterogeneity among clades. Global correlations among climate predictors and SSD were  
4 poorly predictive after correcting for phylogeny, suggesting idiosyncratic histories for this  
5 trait in each lineage. Indeed, we found that SSD closely followed phylogeny (Figure 3), and  
6 in so doing diversified early in avian history (Figure S4). This provides some evidence that  
7 historic effects, such as biogeography and constraints on body size, may each play a major  
8 role in the evolution of SSD. Alternatively, these other relationships may be better explained  
9 by environmental filtering (Weiher & Keddy, 1999) than by correlated evolution of climatic  
10 niche and sexual size dimorphism. To disentangle the complex relationship between  
11 phylogeny and geography, ecology and evolution, studies are needed that simulate these  
12 processes to map a null distribution of species' trait values across the globe.

13 In conclusion, our a priori hypotheses about global geographic and climatic correlates  
14 of SSD in birds (see Introduction) were mostly not supported. Only the hypothesis of higher  
15 male-biased SSD in regions with high climatic seasonality received partial support, and then  
16 only in northern temperate regions. Our results broadly agree with previous studies, which  
17 generally did not identify consistent climatic correlates of SSD in insects, birds, and primates  
18 (Székely *et al.*, 2004; Serrano-Meneses & Székely, 2006; Plavcan *et al.*, 2005; Dunham *et*  
19 *al.*, 2013; Laiolo *et al.*, 2013). There is only one study in seabirds that was able to link SSD  
20 to ocean productivity (Fairbairn & Shine, 1993), but its results remain controversial as they  
21 were contradicted by a follow-up study (Croxall, 1995). We think that all these studies  
22 together suggest that variation in SSD is likely driven by smaller-scale environmental  
23 processes, for example resource clumping on the scale relevant for avian territoriality  
24 (Verner & Willson, 1966). SSD is intimately linked to the behavioral dynamics of sexual  
25 selection, mating systems, and parental roles; we consider our results to suggest that these

1 dynamics may be largely independent of environmental conditions (e.g. Kokko & Jennions,  
2 2008).

3

#### 4 **Acknowledgments**

5 The authors would like to thank R. Freckleton for providing the PGLS script used in this  
6 study. This study was supported by the European Social Fund and the state budget of the  
7 Czech Republic (Project No. CZ.1.07/2.3.00/30.0041).

8

#### 9 **Literature Cited**

10

11

12 Andersson, M. (1994) *Sexual Selection*. Princeton University Press, Princeton NJ.

13 Anderson, David R. (2008) *Model Based Inference in the Life Sciences: A Primer on*  
14 *Evidence*. Springer, New York, NY.

15 Anselin, L., Syabri, I. & Kho, Y. (2006) GeoDa: An introduction to spatial data analysis.  
16 *Geographical Analysis*, **38**, 5-22.

17 Benito, M.M. & González-Solís, J. (2007) Sex ratio, sex-specific chick mortality and sexual  
18 size dimorphism in birds. *Journal of Evolutionary Biology*, **20**, 1522–30.

19 BirdLife International & NatureServe (2011) Bird species distribution maps of the world.  
20 BirdLife International, Cambridge, UK and NatureServe, Arlington, USA.

21 Blackburn, T.M. & Gaston, K.J. (1998) Some methodological issues in macroecology. *The*  
22 *American Naturalist*, **151**, 68–83.

23 Blanckenhorn, W.U., Stillwell, R.C., Young, K.A., Fox, C.W. & Ashton, K.G. (2006) When  
24 Rensch meets Bergmann: does sexual size dimorphism change systematically with  
25 latitude? *Evolution*, **60**, 2004–11.

- 1 Botero, C. A., Boogert, N.J., Vehrencamp, S.L. & Lovette, I.J. (2009) Climatic patterns  
2 predict the elaboration of song displays in mockingbirds. *Current Biology*, **19**, 1151–  
3 5.
- 4 Botero, C. A. & Rubenstein, D.R. (2012) Fluctuating environments, sexual selection and the  
5 evolution of flexible mate choice in birds. *PloS one*, **7**, e32311.
- 6 Brodzik, M. J., & Knowles, K. (2002). *EASE-Grid: a versatile set of equal-area projections*  
7 *and grids. Discrete Global Grids.* (ed. by Goodchild, M. & Kimerling, A.J.), Santa  
8 Barbara, CA, USA: National Center for Geographic Information & Analysis.  
9 [http://www.ncgia.ucsb.edu/globalgrids-book/ease\\_grid/](http://www.ncgia.ucsb.edu/globalgrids-book/ease_grid/)
- 10 Brown, J.L., Morales, V. & Summers, K. (2010) A key ecological trait drove the evolution of  
11 biparental care and monogamy in an amphibian. *The American Naturalist*, **175**, 436–  
12 46.
- 13 Cardillo, M. (2002) The life-history basis of latitudinal diversity gradients: how do species  
14 traits vary from the poles to the equator? *Journal of Animal Ecology*, **71**, 79–87.
- 15 Clutton-Brock, T.H. (1991) *The Evolution of Parental Care*. Princeton University Press,  
16 Princeton, NJ.
- 17 Clutton-Brock, T.H. & Harvey, P.H. (1977) Primate ecology and social organization. *Journal*  
18 *of Zoology, London*, **183**, 1–39.
- 19 Clutton-Brock, T.H., Hodge, S.J., Spong, G., Russell, a F., Jordan, N.R., Bennett, N.C.,  
20 Sharpe, L.L. & Manser, M.B. (2006) Intrasexual competition and sexual selection in  
21 cooperative mammals. *Nature*, **444**, 1065–8.
- 22 Cox, R.M., Skelly, S.L. & John-Alder, H.B. (2003) A comparative test of adaptive  
23 hypotheses for sexual size dimorphism in lizards. *Evolution*, **57**, 1653–69.
- 24 Crook, J. H. (1964) *The Evolution of Social Organisation and Visual Communication in the*  
25 *Weaver Birds (Ploceinae)*. A Behavior Monograph, Suppl. 10. Brill, Leiden.
- 26 Croxall, J.P. (1995) Sexual size dimorphism in seabirds. *Oikos*, **73**, 399–403.



- 1 Dale, J., Dunn, P.O., Figuerola, J., Lislevand, T., Székely, T. & Whittingham, L.A. (2007)  
2 Sexual selection explains Rensch's rule of allometry for sexual size dimorphism.  
3 *Proc. R. Soc. Lond. B*, **274**, 2971–9.
- 4 Dunham, A.E., Maitner, B.S., Razafindratsima, O.H., Simmons, M.C. & Roy, C.L. (2013)  
5 Body size and sexual size dimorphism in primates: influence of climate and net  
6 primary productivity. *Journal of Evolutionary Biology*, **26**, 2312–20.
- 7 Dunn, P.O., Whittingham, L.A. & Pitcher, T.E. (2001) Mating systems, sperm competition,  
8 and the evolution of sexual dimorphism in birds. *Evolution*, **55**, 161–75.
- 9 Emlen, S.T. & Oring, L.W. (1977) Ecology, sexual selection, and the evolution of mating  
10 systems. *Science*, **197**, 215–223.
- 11 Fairbairn, J. & Shine, R. (1993) Patterns of sexual size dimorphism in seabirds of the  
12 Southern Hemisphere. *Oikos*, **68**, 139–145.
- 13 Fairbairn, D.J., Blanckenhorn, W.U. & Székely, T. (2007) *Sex, Size, and Gender Roles*.  
14 Oxford University Press, New York, NY.
- 15 Freckleton, R.P. (2012) Fast likelihood calculations for comparative analyses. *Methods in*  
16 *Ecology and Evolution*, **3**, 940–947.
- 17 Gonzalez, J.T., Sheldon, B.C., Tobias, J.A. & Tobias, J.A. (2013) Environmental stability  
18 and the evolution of cooperative breeding in hornbills. *Proceedings of the Royal*  
19 *Society of London B*, **280**, 1786.
- 20 Hackett, S.J., Kimball, R.T., Reddy, S., Bowie, R.C.K., Braun, E.L., Braun, M.J.,  
21 Chojnowski, J.L., Cox, W.A., Han, K.-L., Harshman, J., Huddleston, C.J., Marks,  
22 B.D., Miglia, K.J., Moore, W.S., Sheldon, F.H., Steadman, D.W., Witt, C.C. & Yuri,  
23 T. (2008) A phylogenomic study of birds reveals their evolutionary history. *Science*,  
24 **320**, 1763–1768.
- 25 Harmon, L.J., Schulte, J. a, Larson, A. & Losos, J.B. (2003) Tempo and mode of  
26 evolutionary radiation in iguanian lizards. *Science*, **301**, 961–4.
- 27 Harmon, L. J., Weir, J. T., Brock, C. D., Glor, R. E., Challenger, W. (2008) GEIGER:  
28 investigating evolutionary radiations. *Bioinformatics*, **24**, 129–131.

- 1 Harris, I., Jones, P.D., Osborn, T.J. & Lister, D.H. (2013) Updated high-resolution grids of  
2 monthly climatic observations - the CRU TS3.10 Dataset. *International Journal of*  
3 *Climatology*, **34**, 623–642.
- 4 Hijmans, R.J., Cameron, S.E., Parra, J.L., Jones, P.G. & Jarvis, A. (2005) Very high  
5 resolution interpolated climate surfaces for global land areas. *International Journal of*  
6 *Climatology*, **25**, 1965–1978.
- 7 Holt, B.G., Lessard, J.-P., Borregaard, M.K., Fritz, S. a, Araújo, M.B., Dimitrov, D., Fabre,  
8 P.-H., Graham, C.H., Graves, G.R., Jønsson, K. a, Nogués-Bravo, D., Wang, Z.,  
9 Whittaker, R.J., Fjeldså, J. & Rahbek, C. (2013) An update of Wallace’s  
10 zoogeographic regions of the world. *Science*, **339**, 74–8.
- 11 Jarman, P.J. (1974) The social organisation of antelope in relation to their ecology. *Behavior*,  
12 **48**, 215–267.
- 13 Jetz, W. & Rubenstein, D.R. (2011) Environmental uncertainty and the global biogeography  
14 of cooperative breeding in birds. *Current Biology*, **21**, 72–78.
- 15 Jetz, W., Thomas, G.H., Joy, J.B., Hartmann, K. & Mooers, A.O. (2012) The global diversity  
16 of birds in space and time. *Nature*, **491**, 444–8.
- 17 Jones, K.S., Nakagawa, S. & Sheldon, B.C. (2009) Environmental sensitivity in relation to  
18 size and sex in birds: meta-regression analysis. *The American Naturalist*, **174**, 122–  
19 33.
- 20 Kokko, H. & Jennions, M.D. (2008) Parental investment, sexual selection and sex ratios.  
21 *Journal of Evolutionary Biology*, **21**, 919–48.
- 22 Krüger, O. (2005) The evolution of reversed sexual size dimorphism in hawks, falcons and  
23 owls: a comparative study. *Evolutionary Ecology*, **19**, 467–486.
- 24 Laiolo, P., Illera, J.C. & Obeso, J.R. (2013) Local climate determines intra- and interspecific  
25 variation in sexual size dimorphism in mountain grasshopper communities. *Journal of*  
26 *Evolutionary Biology*, **26**, 2171–83.
- 27 Liker, A., Freckleton, R.P. & Székely, T. (2013) The evolution of sex roles in birds is related  
28 to adult sex ratio. *Nature Communications*, **4**, 1587.

- 1 Lindenfors, P., Székely, T. & Reynolds, J.D. (2003) Directional changes in sexual size  
2 dimorphism in shorebirds, gulls and alcids. *Journal of Evolutionary Biology*, **16**, 930–  
3 8.
- 4 Lindstedt, S.L. & Boyce, M.S. (1985) Seasonality, fasting endurance, and body size in  
5 mammals. *The American Naturalist*, **125**, 873–878.
- 6 Lislevand, T., Figuerola, J., & Székely, T. (2007) Avian body sizes in relation to fecundity,  
7 mating system, display behavior, and resource sharing. *Ecology*, **88**, 1605-1605.
- 8 Lislevand, T., Figuerola, J. & Székely, T. (2009) Evolution of sexual size dimorphism in  
9 grouse and allies (Aves: Phasianidae) in relation to mating competition, fecundity  
10 demands and resource division. *Journal of Evolutionary Biology*, **22**, 1895–905.
- 11 Lovich, J.E. & Gibbons, J.W. (1992) A review of techniques for quantifying sexual size  
12 dimorphism. *Growth, Development & Aging*, **56**, 269–281.
- 13 Lukas, D. & Clutton-Brock, T.H. (2013) The evolution of social monogamy in mammals.  
14 *Science*, **341**, 526–30.
- 15 Martin, P.R., Montgomerie, R. & Lougheed, S.C. (2010) Rapid sympatry explains greater  
16 color pattern divergence in high latitude birds. *Evolution*, **64**, 336–47.
- 17 Oakes, E.J. (1992) Lekking and the evolution of sexual dimorphism in birds: comparative  
18 approaches. *The American Naturalist*, **140**, 665–684.
- 19 Orians, G.H. (1969) On the evolution of mating systems in birds and mammals. *The*  
20 *American Naturalist*, **103**, 589–603.
- 21 Owens, I.P.F. & Bennett, P.M. (1997) Variation in mating system among birds: ecological  
22 basis revealed by hierarchical comparative analysis of mate desertion. *Proc. R. Soc.*  
23 *Lond. B*, **264**, 1103–1110.
- 24 Owens, I.P.F. & Hartley, I.R. (1998) Sexual dimorphism in birds: why are there so many  
25 different forms of dimorphism? *Proc. R. Soc. Lond. B*, **265**, 397–407.
- 26 Pagel, M. (1999) Inferring the historical patterns of biological evolution. *Nature*, **401**, 877-  
27 884.

- 1 Paradis, E., Claude, J. & Strimmer, K. (2004) APE: Analyses of Phylogenetics and Evolution  
2 in R language. *Bioinformatics*, **20**, 289–290.
- 3 Payne, R.B. (1984) Sexual selection, lek and arena behavior, and sexual size dimorphism in  
4 birds. *Ornithology Monographs*, 1–52.
- 5 Pérez-Barbería, F.J., Gordon, I.J. & Pagel, M. (2002) The origins of sexual dimorphism in  
6 body size in ungulates. *Evolution*, **56**, 1276–85.
- 7 Plavcan, J.M., van Schaik, C.P. & McGraw, W.S. (2005) *Seasonality, social organisation  
8 and sexual dimorphism in primates. Seasonality in Primates: Studies of Living and  
9 Extinct Human and Non-Human Primates* (ed. by D.K. Brockman, C. van Schaik),  
10 pp. 401–441. Cambridge University Press, Cambridge, UK.
- 11 QGIS Development Team (2013) QGIS Geographic Information System Open Source  
12 Geospatial Foundation Project. <http://qgis.osgeo.org>
- 13 R Core Team (2013) R: A language and environment for statistical computing. R Foundation  
14 for Statistical Computing, Vienna, Austria. <http://www.R-project.org/>
- 15 Raia, P. & Meiri, S. (2006) The island rule in large mammals: paleontology meets ecology.  
16 *Evolution*, **60**, 1731–42.
- 17 Raihani, G., Székely, T., Serrano-Meneses, M.A., Pitra, C. & Goriup, P. (2006) The  
18 influence of sexual selection and male agility on sexual size dimorphism in bustards  
19 (Otididae). *Animal Behaviour*, **71**, 833–838.
- 20 Rangel, T.F., Diniz-Filho, J.A.F. & Bini, L.M. (2010) SAM: a comprehensive application for  
21 Spatial Analysis in Macroecology. *Ecography*, **33**, 46–50.
- 22 Remeš, V. & Székely, T. (2010) Domestic chickens defy Rensch's rule: sexual size  
23 dimorphism in chicken breeds. *Journal of Evolutionary Biology*, **23**, 2754–2759.
- 24 Rensch, B. (1950) Die Abhängigkeit der relativen Sexualdifferenz von der Körpergröße.  
25 *Bonner Zoologische Beiträge*, **1**, 58–69.
- 26 Ridgely, R.S., Allnutt, T.F., Brooks, T., McNicol, D.K., Mehlman, D.W., Young, B.E.,  
27 Zook, J.R., BirdLife International (2011) *Digital Distribution Maps of the Birds of the*

- 1           *Western Hemisphere*, version 4.0. *Bird species distribution maps of the world*.  
2           BirdLife International, Cambridge, UK, and NatureServe, Arlington, USA.
- 3     Royle, N.J., Smiseth, P.T. & Kölliker, M. (2012) *The Evolution of Parental Care*. Oxford  
4           University Press, Oxford.
- 5     Rubenstein, D.R. & Lovette, I.J. (2007) Temporal environmental variability drives the  
6           evolution of cooperative breeding in birds. *Current Biology*, **17**, 1414–9.
- 7     Rubenstein, D.R. & Lovette, I.J. (2009) Reproductive skew and selection on female  
8           ornamentation in social species. *Nature*, **462**, 786–789.
- 9     Schemske, D.W., Mittelbach, G.G., Cornell, H. V., Sobel, J.M. & Roy, K. (2009) Is there a  
10          latitudinal gradient in the importance of biotic interactions? *Annual Review of*  
11          *Ecology, Evolution, and Systematics*, **40**, 245–269.
- 12    Serrano-Meneses, M.A. & Székely, T. (2006) Sexual size dimorphism in seabirds: sexual  
13          selection, fecundity selection and differential niche-utilisation. *Oikos*, **113**, 385–394.
- 14    Shreeves, G. & Field, J. (2007) Parental care and sexual size dimorphism in wasps and bees.  
15          *Behavioral Ecology and Sociobiology*, **62**, 843–852.
- 16    Symonds, M. R. E., & Blomberg, S. P. (2014) *A primer on phylogenetic generalised least*  
17          *squares. Modern Phylogenetic Comparative Methods and Their Application in*  
18          *Evolutionary Biology: Concepts and Practice*. (ed. by L. Z. Garamszegi), pp. 105-  
19          130. Springer-Verlag, Berlin.
- 20    Székely, T., Reynolds, J.D. & Figuerola, J. (2000) Sexual size dimorphism in shorebirds,  
21          gulls, and alcids: the influence of sexual and natural selection. *Evolution*, **54**, 1404–  
22          1413.
- 23    Székely, T., Freckleton, R.P. & Reynolds, J.D. (2004) Sexual selection explains Rensch’ s  
24          rule of size dimorphism in shorebirds. *Proceedings of the National Academy of*  
25          *Sciences*, **101**, 12224–12227.
- 26    Székely, T., Lislevand, T. & Figuerola, J. (2007) *Sexual size dimorphism in birds. Sex, Size,*  
27          *and Gender Roles*. (ed. by D.J. Fairbairn, W.U. Blanckenhorn, T. Székely), pp. 27-37.  
28          Oxford University Press, New York, NY.

- 1 Tamate, T. & Maekawa, K. (2006) Latitudinal variation in sexual size dimorphism of sea-run  
2 Masu Salmon *Oncorhynchus masou*. *Evolution*, **60**, 196–201.
- 3 Trivers, R.L. (1972) *Parental Investment and Sexual Selection*. *Sexual Selection and the*  
4 *Descent of Man 1871-1971* (ed. by B. Campbell), pp. 136–179. Aldine Publishing  
5 Company, Chicago, IL.
- 6 Verner, J. & Willson, M.F. (1966) The influence of habitats on mating systems of North  
7 American passerine birds. *Ecology*, **47**, 143–147.
- 8 Webster, M.S. (1992) Sexual dimorphism, mating system and body size in New World  
9 blackbirds (Icterinae). *Evolution*, **46**, 1621–1641.
- 10 Weckerly, F.W. (1998) Sexual-size dimorphism: influence of mass and mating systems in  
11 the most dimorphic mammals. *Journal of Mammology*, **79**, 33–52.
- 12 Weiher, E. & Keddy, P. (1999) *Ecological Assembly Rules: Perspectives, advances, retreats*.  
13 Cambridge University Press, New York, NY.
- 14 Wikelski, M. & Trillmich, F. (1997) Body size and sexual size dimorphism in marine  
15 iguanas fluctuate as a result of opposing natural and sexual selection: an island  
16 comparison. *Evolution*, **51**, 922–936

# 1 Tables

## 2 Table 1

Table 1: Regression of the response variable, sexual dimorphism index (SDI), as explained by environmental predictor variables. Univariate predictor regressions are shown in regular weight text, while multivariate predictor models are shown in bold with their individual component variables listed below. This table compares the goodness of fit for spatial analyses across the global grid using weighted least squares (WLS) and spatial autoregression (SAR), as well as phylogenetic comparative analyses among species using phylogenetic generalized least squares (PGLS).  $\Delta$ AIC values represent the difference between each model and the best-fitting model for that analysis, with the AIC of PGLS analyses averaged across trees. The "Geographic" model includes absolute latitude but not latitude in this and all subsequent analyses.

|                            | WLS          |                |            | SAR          |                | z |  | PGLS             |             | b        |
|----------------------------|--------------|----------------|------------|--------------|----------------|---|--|------------------|-------------|----------|
|                            | $\Delta$ AIC | R <sup>2</sup> |            | $\Delta$ AIC | R <sup>2</sup> |   |  | R <sup>2*</sup>  |             |          |
| Latitude                   | 0            | 0.06 -         | 202        | 0.35         | -20 -          |   |  | 3.3 ± 0.2        | 0.00        | -6.1E-06 |
| <b>Geographic</b>          | <b>88</b>    | <b>0.05</b>    | <b>311</b> | <b>0.35</b>  |                |   |  | <b>6.1 ± 0.4</b> | <b>0.00</b> |          |
| Absolute Latitude          | 249          | 0.05 -         | 322        | 0.35         | -17 -          |   |  | 3.2 ± 0.2        | 0.00        | 3.9E-06  |
| Altitude                   | 1082         | 0.01 -         | 593        | 0.34         | -3.3 -         |   |  | 4.2 ± 0.4        | 0.00        | 1.7E-05  |
| <b>Annual Mean Climate</b> | <b>553</b>   | <b>0.03</b>    | <b>486</b> | <b>0.34</b>  |                |   |  | <b>6.8 ± 0.4</b> | <b>0.00</b> |          |
| Temperature                | 699          | 0.02 +         | 485        | 0.34         | 11.1 +         |   |  | 4.4 ± 0.3        | 0.00        | 1.7E-05  |
| Precipitation              | 874          | 0.02 +         | 591        | 0.34         | 3.63 +         |   |  | 4.7 ± 0.3        | 0.00        | 6.3E-06  |
| <b>Within-Year Var</b>     | <b>693</b>   | <b>0.02</b>    | <b>332</b> | <b>0.35</b>  |                |   |  | <b>9.0 ± 0.5</b> | <b>0.00</b> |          |
| Temperature                | 1131         | 0.00 -         | 412        | 0.35         | 16.2 +         |   |  | 5.7 ± 0.3        | 0.00        | -6.2E-07 |
| Precipitation              | 700          | 0.02 +         | 514        | 0.34         | 9.51 +         |   |  | 3.1 ± 0.3        | 0.00        | -2.1E-04 |
| <b>Among-Year Var</b>      | <b>1151</b>  | <b>0.00</b>    | <b>0</b>   | <b>0.36</b>  |                |   |  | <b>3.6 ± 0.2</b> | <b>0.00</b> |          |
| Temperature                | 1170         | 0.00 -         | 17         | 0.36         | 26.1 +         |   |  | 3.5 ± 0.3        | 0.00        | -9.4E-05 |
| Precipitation              | 1172         | <b>0.00</b> -  | 579        | 0.34         | 5.01 +         |   |  | 0.0 ± 0.0        | 0.00        | -5.4E-02 |

\* - Refers to adjusted pseudo-R<sup>2</sup> values. R<sup>2</sup> values for PGLS analyses should be interpreted cautiously (Symonds and Blomberg, 2014).

## 1 **Figure Legends**

2 Figure 1: Global distribution of sexual size dimorphism and its correlates. (A) Mean Sexual  
3 Dimorphism Index (SDI) of species in each cell of a 1° equivalent equal area grid, with color  
4 classes representing 10%-ile bins. (B) Zoogeographical regions, as described by Holt *et al.*  
5 (2013). (C) Scatterplots of SDI versus the ecological predictor variables examined in this  
6 study; these have been rasterized to show point density. Trend lines represent sampling-  
7 weighted correlations for each zoogeographical region, which is labeled by color. Line width  
8 indicates model rank, with thicker lines representing more closely fitting models for that  
9 region.

10 Figure 2: Best-fitting linear models inferred from Weighted Least Squares regression (A)  
11 across global grid cells, Spatial Auto-regression (B) across global grid cells, and  
12 Phylogenetic Generalized Least Squares (C) across species. Scatterplots have been rasterized  
13 to show point density. The Sexual Dimorphism Index (SDI) is lowest at high latitudes, and  
14 increases in areas where temperature is less predictable between years.

15 Figure 3: Histogram of optimum Pagel's lambda estimates for SDI, repeated across 100  
16 samples from the posterior tree block of Jetz *et al.* (2012). Pagel's lambda is a tree  
17 transformation parameter whose optimum represents the amount of phylogenetic signal  
18 exhibited by a trait (Pagel 1999). A parameter value of 0 suggests weak phylogenetic signal,  
19 with the trait evolving as though on a star-tree phylogeny, while a parameter value of 1  
20 suggests strong phylogenetic signal.



## 1 Figures

## 2 Figure 1

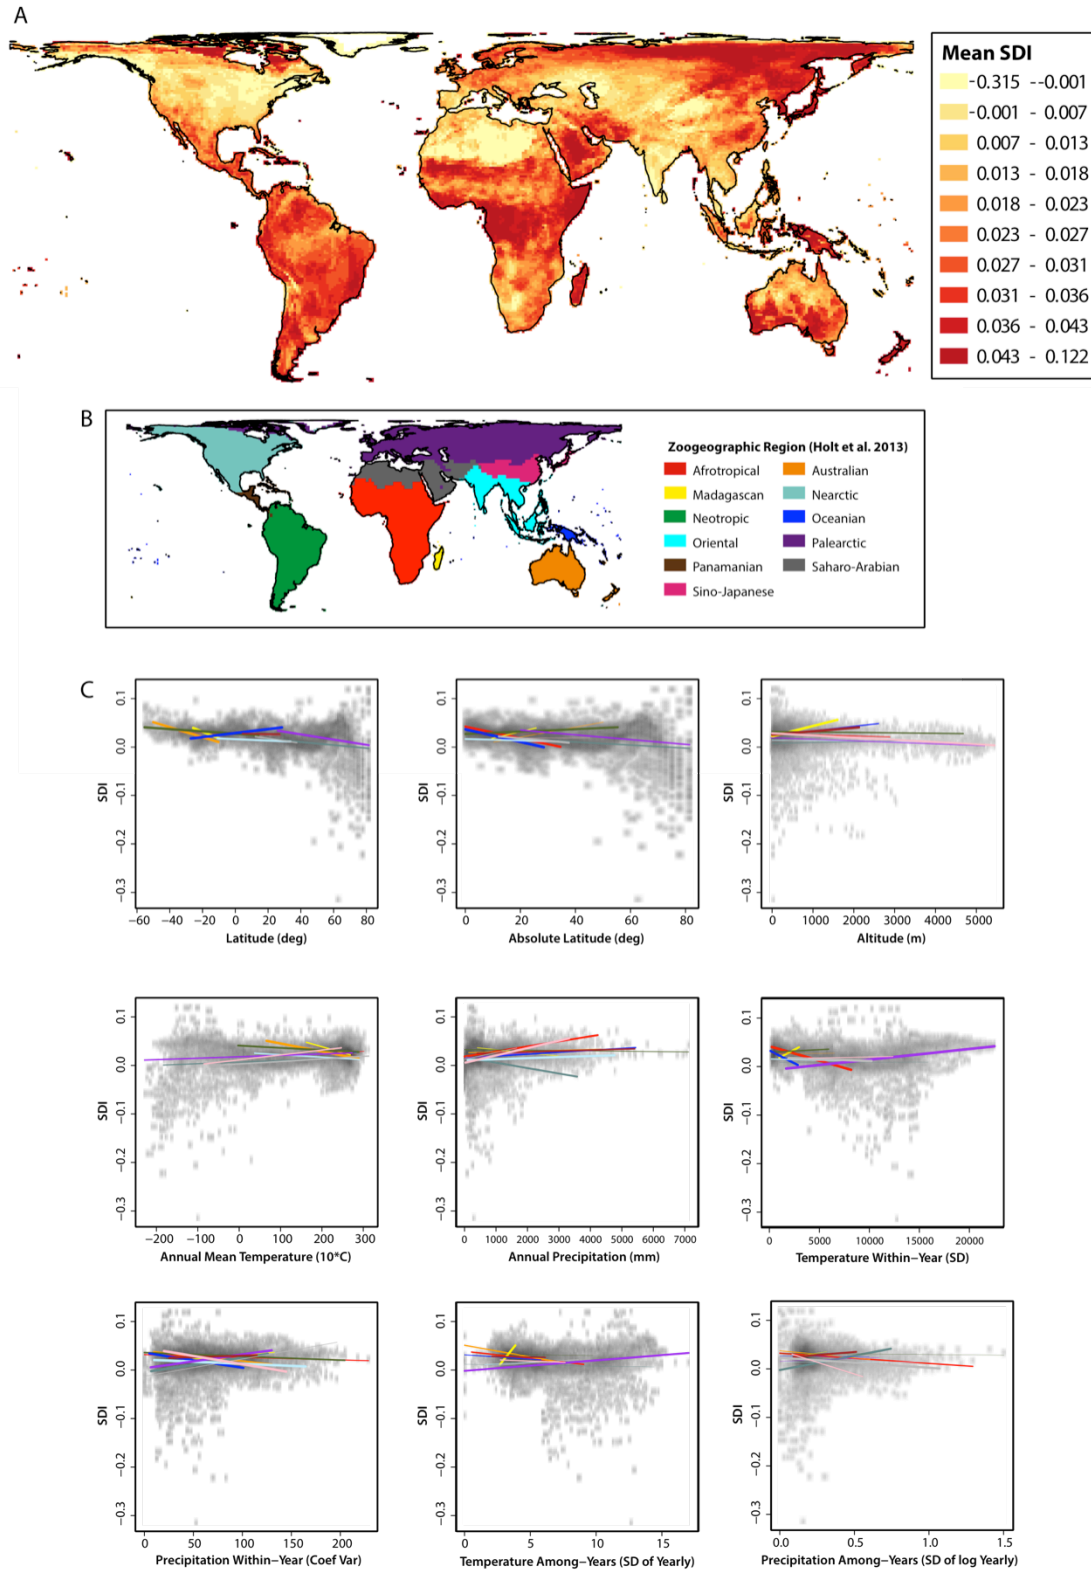

1 **Figure 2**

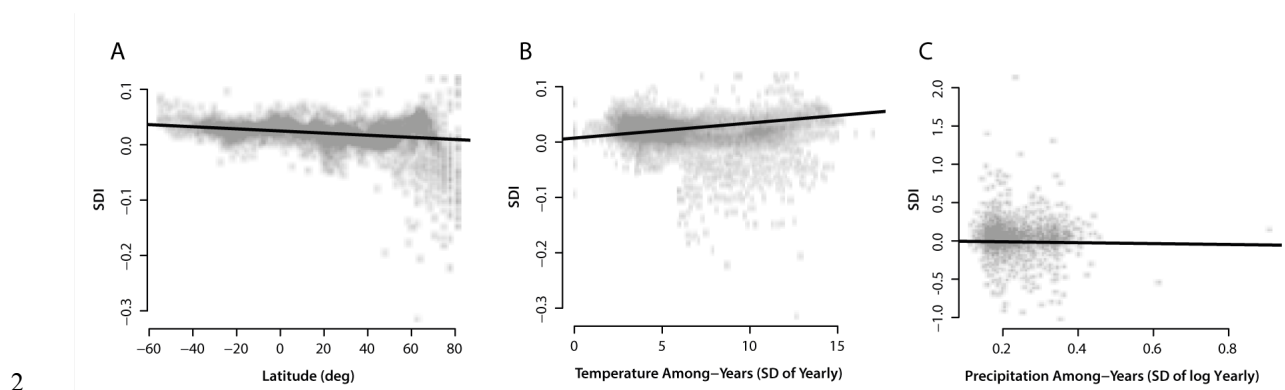

3 **Figure 3**

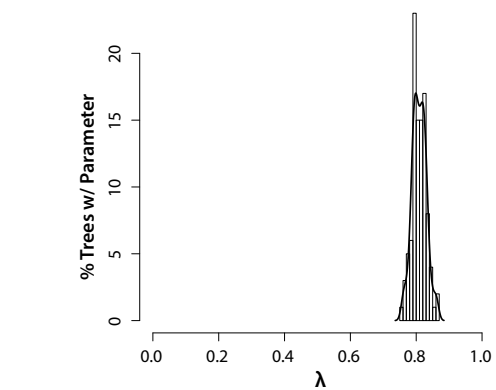

1 **Supporting Material**

2 **Figure S1**

3

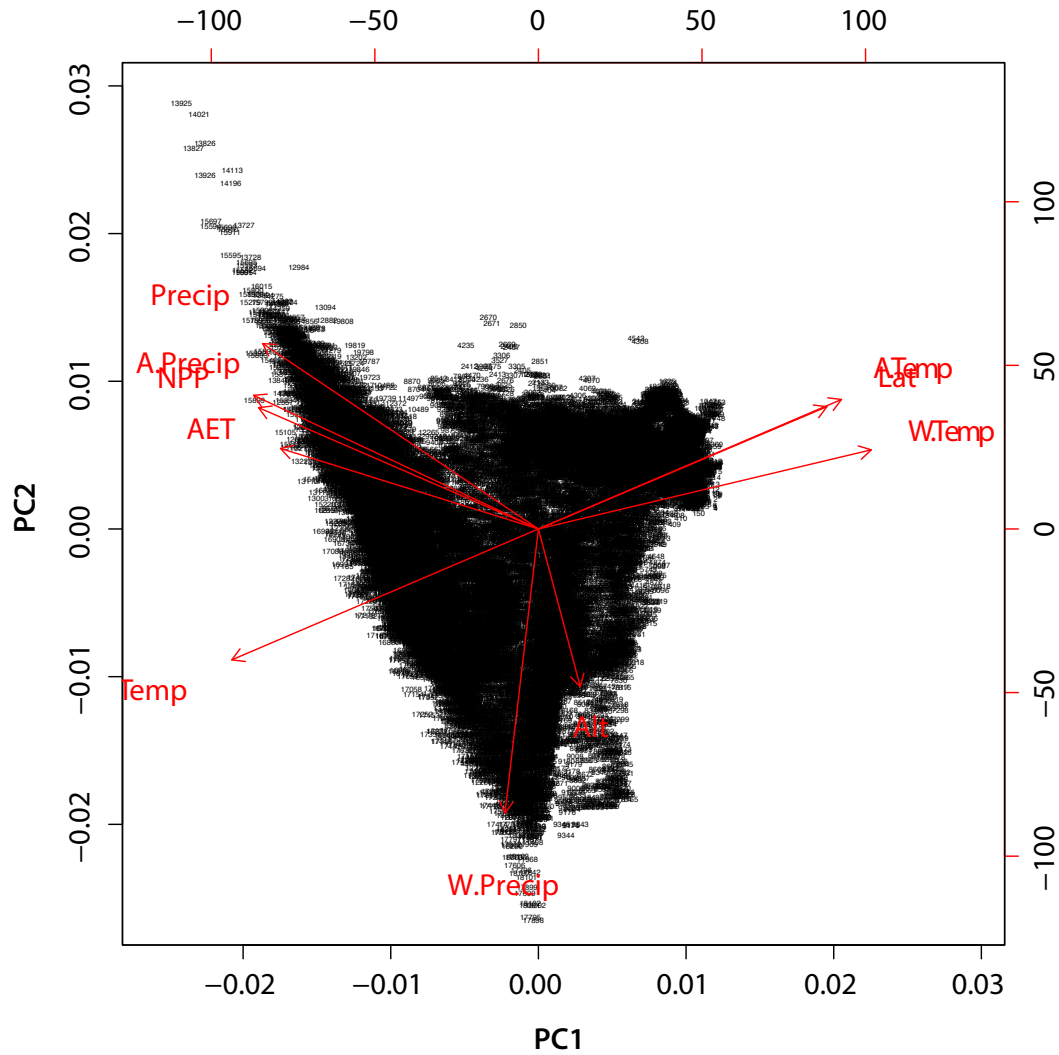

Supplementary Figure 1: Exploratory principle components analysis of climate predictor variables. Net Primary Productivity (NPP) and Actual Evapo-Transpiration (AET) were excluded from further analyses as they closely correlate with Precipitation. The prefixes "W" and "A" refer to within-year and among-year climate variation, respectively.

1 **Figure S2**

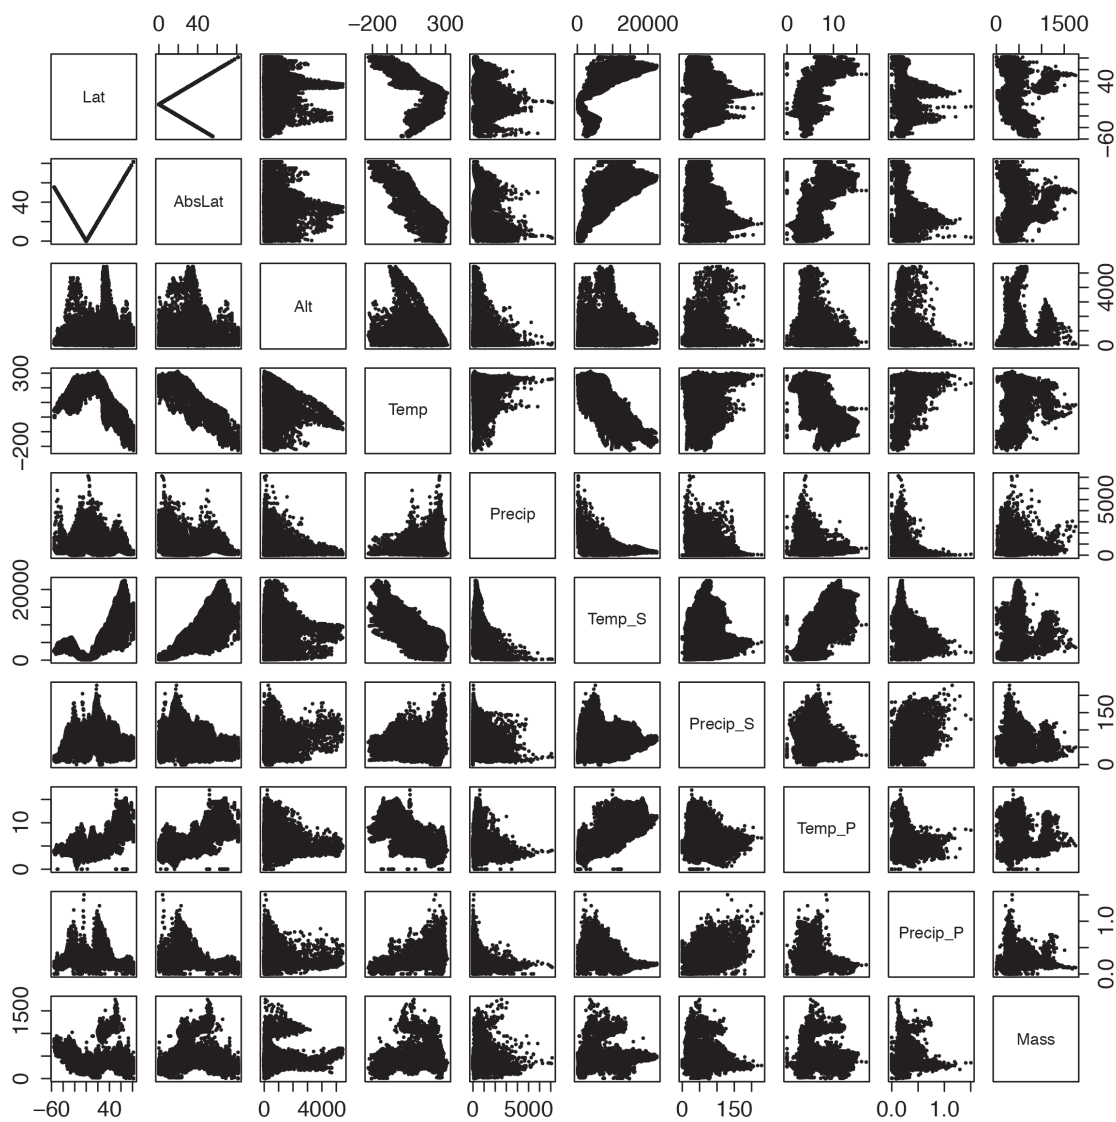

Supplementary Figure 2: Relationships among predictor variables included in modeling global variation in SDI.

1 **Figure S3**

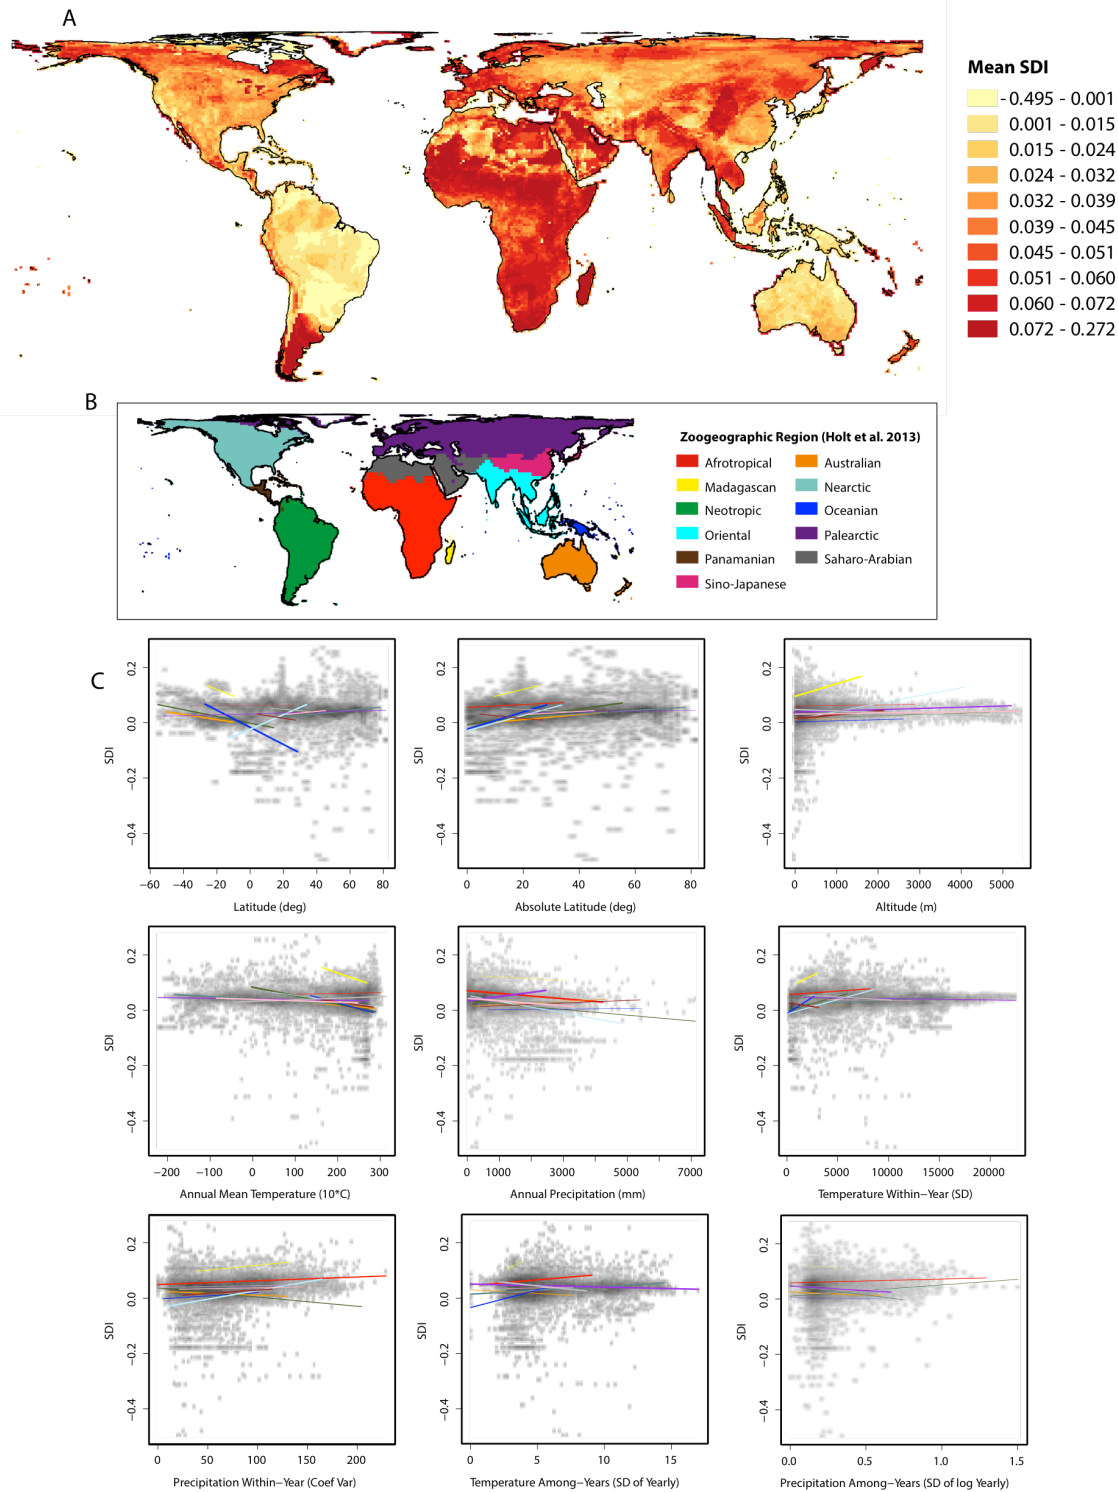

Supplementary Figure S3: Using only breeding distributions, the global distribution of sexual size dimorphism and its climate correlates. (A) Mean Sexual Dimorphism Index (SDI) of species in each cell of a 1° equivalent equal area grid, with color classes representing 10%-ile bins. (B) Zoogeographical regions, as described by Holt et al. (2013). (C) Scatterplots of SDI versus the ecological predictor variables examined in this study; these have been rasterized to show point density. Trend lines represent sampling-weighted correlations for each zoogeographical region, which is labeled by color. Line width indicates model rank, with thicker lines representing more closely fitting models for that region.

1 **Figure S4**

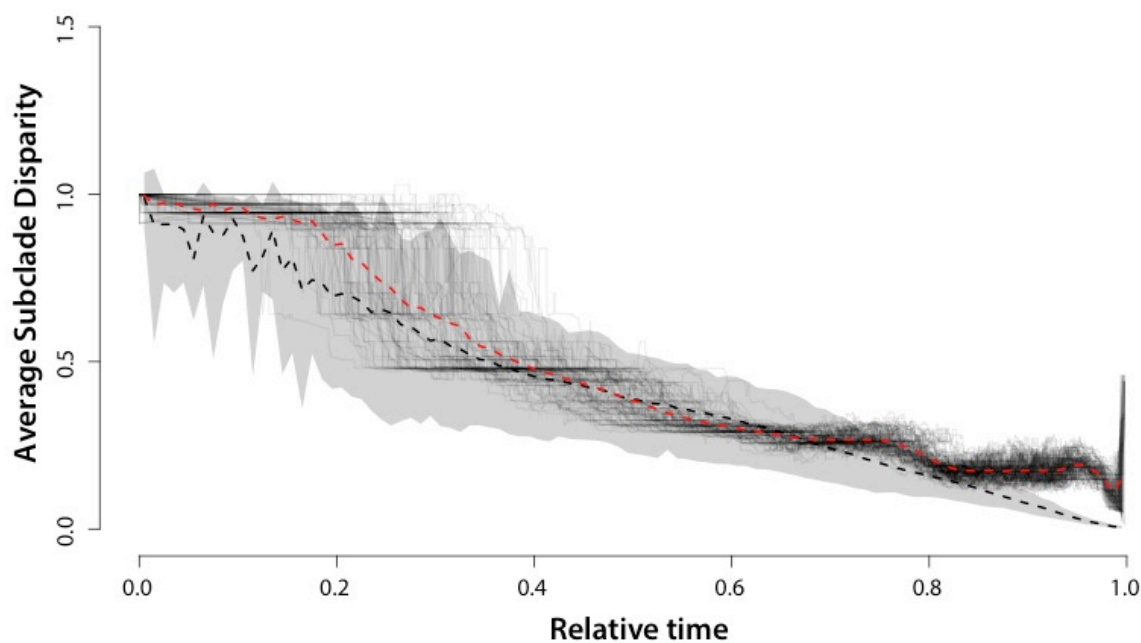

Supplementary Figure 3: Disparity-through-time (DTT) plot of SDI for all birds. Black lines represent DTT trajectories for each of 100 trees sampled from Jetz et al. (2012), and the dotted red line is an average of these. The grey shaded area represents the 95% confidence interval of null expectation based on simulations under a Brownian motion model (see Harmon et al. 2003), and the dotted black line is an average of these. In periods with low values of subclade disparity, clades tend to occupy narrow, non-overlapping portions of character space. Thus, the early decrease in this value suggests that sexual size dimorphism diversified early among avian lineages (albeit not earlier than expected by chance).

2

3

1 **Table S1**

Table S1: Comparison of environmental predictor models while correcting for variation in average body mass. All models are a significant fit at  $p < 0.001$ .  $\Delta$ AIC values represent the difference between each model and the best-fitting model for that analysis. Multivariate models are shown in bold, with their variables listed below.

|                        | WLS            |   | SAR          |        |   |
|------------------------|----------------|---|--------------|--------|---|
|                        | $\Delta$ AIC   |   | $\Delta$ AIC | z      |   |
| Latitude               | 0              | - | 217          | -20.07 | - |
| <b>Geographic</b>      | <b>6.6</b>     |   | <b>369</b>   |        |   |
| Absolute Latitude      | 1177.93        | - | 309          | -17.48 | - |
| Altitude               | 1087.64        | - | 592          | -3.63  | - |
| <b>Average Climate</b> | <b>523.72</b>  |   | <b>483</b>   |        |   |
| Temperature            | 683.5          | + | 483          | 11.28  | + |
| Precipitation          | 872.06         | + | 592          | 3.63   | + |
| <b>Within-Year Var</b> | <b>674.83</b>  |   | <b>308</b>   |        |   |
| Temperature            | 1133.97        | - | 395          | 17.17  | + |
| Precipitation          | 687.82         | + | 508          | 9.86   | + |
| <b>Among-Year Var</b>  | <b>1157.58</b> |   | <b>0</b>     |        |   |
| Temperature            | 1177.54        | - | 19           | 26.03  | + |
| Precipitation          | 1180.61        | - | 578          | 5.24   | + |

2

3

1 **Table S2**

Supplementary Table S2: Comparison of relationships between environmental predictor models and SDI calculated from species breeding ranges. Univariate predictor regressions are shown in regular weight text, while multivariate predictor models are shown in bold with their individual component variables listed below. This table compares the goodness of fit for spatial analyses across the global grid using weighted least squares (WLS) and spatial autoregression (SAR), as well as phylogenetic comparative analyses among species using phylogenetic generalized least squares (PGLS).  $\Delta$ AIC values represent the difference between each model and the best-fitting model for that analysis, with the AIC of PGLS analyses averaged across trees.

|                        | WLS          |                | SAR          |                |      | PGLS              |                 |          |
|------------------------|--------------|----------------|--------------|----------------|------|-------------------|-----------------|----------|
|                        | $\Delta$ AIC | R <sup>2</sup> | $\Delta$ AIC | R <sup>2</sup> | z    | $\Delta$ AIC      | R <sup>2*</sup> | b        |
| Latitude               | 779          | 0.00           | 92           | 0.31           | 5.65 | 19.5 ± 0.8        | 0.00            | 4.20E-06 |
| <b>Geographic</b>      | <b>606</b>   | <b>0.01</b>    |              |                |      | <b>13.0 ± 0.6</b> | <b>0.00</b>     |          |
| Absolute Latitude      | 847          | 0.00           | 0            | 0.31           | 11.2 | 18.1 ± 0.6        | 0.00            | 6.46E-06 |
| Altitude               | 610          | 0.01           | 59           | 0.3            | 8.05 | 11.2 ± 0.7        | 0.00            | 1.81E-07 |
| <b>Average Climate</b> | <b>627</b>   | <b>0.01</b>    |              |                |      | <b>10.7 ± 0.4</b> | <b>0.00</b>     |          |
| Temperature            | 826          | 0.00           | 49           | 0.31           | -8.6 | 22.0 ± 0.6        | 0.00            | 1.27E-06 |
| Precipitation          | 626          | 0.00           | 92           | 0.31           | -5.9 | 0.0 ± 0.0         | 0.00            | 2.20E-07 |
| <b>Within-Year Var</b> | <b>0</b>     | <b>0.05</b>    |              |                |      | <b>21.4 ± 0.6</b> | <b>0.00</b>     |          |
| Temperature            | 833          | 0.00           | 30           | 0.31           | 9.73 | 16.3 ± 0.5        | 0.00            | 3.10E-08 |
| Precipitation          | 2            | 0.04           | 107          | 0.31           | 4.16 | 23.4 ± 0.8        | 0.00            | 3.67E-06 |
| <b>Among-Year Var</b>  | <b>713</b>   | <b>0.01</b>    |              |                |      | <b>19.0 ± 0.6</b> | <b>0.00</b>     |          |
| Temperature            | 811          | 0.00           | 44           | 0.31           | 8.95 | 20.1 ± 0.6        | 0.00            | 4.92E-05 |
| Precipitation          | 785          | 0.00           | 117          | 0.31           | -2.7 | 14.5 ± 0.6        | 0.00            | 1.17E-03 |

\* - Refers to adjusted pseudo-R<sup>2</sup> values. R<sup>2</sup> values for PGLS analyses should be interpreted cautiously (Symonds and Blomberg, 2014).



1 **Table S3**

Supplementary Table 3: Comparison of weighted least squared regressions across zoogeographic regions (citation). Significance level is indicated by asterics (N.S. > 0.05, \* < 0.05, \*\* < 0.01, \*\*\* < 0.001). Direction of relationship is indicated by a + for a positive relationship, and a - for a negative relationship. Best-fit multivariate models are shaded in light grey, and best-fit predictor variables are shaded in a darker grey.

|                        | Afrotropics  |                |        | Australian     |                |        | Madagascan    |                |        | Nearctic     |                |        |  |
|------------------------|--------------|----------------|--------|----------------|----------------|--------|---------------|----------------|--------|--------------|----------------|--------|--|
|                        | $\Delta$ AIC | R <sup>2</sup> | p      | $\Delta$ AIC   | R <sup>2</sup> | p      | $\Delta$ AIC  | R <sup>2</sup> | p      | $\Delta$ AIC | R <sup>2</sup> | p      |  |
| Latitude               | 1636         | 0.01           | *** -  | 13             | 0.35           | *** -  | 19            | 0.10           | *** -  | 328          | 0.05           | *** -  |  |
| <b>Geographic</b>      | <b>466</b>   | <b>0.31</b>    | ***    | <b>0</b>       | <b>0.35</b>    | *** -  | <b>0</b>      | <b>0.25</b>    | **     | <b>329</b>   | <b>0.05</b>    | ***    |  |
| Absolute Latitude      | 475          | 0.31           | *** -  | 13             | 0.35           | *** +  | 19            | 0.10           | *** +  | 328          | 0.05           | *** -  |  |
| Altitude               | 1654         | 0.00           | *** -  | 517            | 0.00           | N.S. - | 6             | 0.20           | *** +  | 448          | 0.00           | ** +   |  |
| <b>Average Climate</b> | <b>1013</b>  | <b>0.18</b>    | ***    | <b>3</b>       | <b>0.35</b>    | ***    | <b>9</b>      | <b>0.19</b>    | ***    | <b>50</b>    | <b>0.14</b>    | ***    |  |
| Temperature            | 1639         | 0.01           | *** +  | 10             | 0.35           | *** -  | 19            | 0.10           | *** -  | 376          | 0.03           | *** +  |  |
| Precipitation          | 1095         | 0.16           | *** +  | 514            | 0.00           | * +    | 23            | 0.06           | ** -   | 238          | 0.08           | *** -  |  |
| <b>Within-Year Var</b> | <b>0</b>     | <b>0.40</b>    | ***    | <b>21</b>      | <b>0.34</b>    | ***    | <b>5</b>      | <b>0.22</b>    | ***    | <b>0</b>     | <b>0.16</b>    | ***    |  |
| Temperature            | 86           | 0.39           | *** -  | 518            | 0.00           | N.S. + | 17            | 0.12           | *** +  | 457          | 0.00           | N.S. + |  |
| Precipitation          | 1616         | 0.02           | *** -  | 82             | 0.31           | * -    | 22            | 0.07           | ** +   | 13           | 0.15           | *** +  |  |
| <b>Among-Year Var</b>  | <b>1396</b>  | <b>0.08</b>    | ***    | <b>353</b>     | <b>0.13</b>    | **     | <b>1</b>      | <b>0.24</b>    | **     | <b>215</b>   | <b>0.09</b>    | ***    |  |
| Temperature            | 1481         | 0.06           | *** -  | 359            | 0.13           | *** -  | 7             | 0.19           | *** +  | 449          | 0.00           | ** -   |  |
| Precipitation          | 1474         | 0.06           | *** -  | 422            | 0.08           | *** -  | 29            | 0.01           | N.S. + | 216          | 0.09           | *** +  |  |
|                        | Neotropical  |                |        | Oceanina       |                |        | Oriental      |                |        | Palearctic   |                |        |  |
|                        | $\Delta$ AIC | R <sup>2</sup> | p      | $\Delta$ AIC   | R <sup>2</sup> | p      | $\Delta$ AIC  | R <sup>2</sup> | p      | $\Delta$ AIC | R <sup>2</sup> | p      |  |
| Latitude               | 0            | 0.14           | *** -  | 63             | 0.03           | ** +   | 106           | 0.02           | *** -  | 377          | 0.03           | *** -  |  |
| <b>Geographic</b>      | <b>33</b>    | <b>0.12</b>    | ***    | <b>0</b>       | <b>0.19</b>    | ***    | <b>117</b>    | <b>0.01</b>    | ***    | <b>263</b>   | <b>0.05</b>    | ***    |  |
| Absolute Latitude      | 49           | 0.12           | *** +  | 3              | 0.17           | *** -  | 115           | 0.01           | *** -  | 380          | 0.03           | *** -  |  |
| Altitude               | 346          | 0.01           | *** -  | 64             | 0.03           | ** +   | 135           | 0.00           | N.S. - | 554          | 0.00           | *** -  |  |
| <b>Average Climate</b> | <b>120</b>   | <b>0.09</b>    | ***    | <b>63</b>      | <b>0.03</b>    | N.S.   | <b>70</b>     | <b>0.05</b>    | ***    | <b>532</b>   | <b>0.00</b>    | ***    |  |
| Temperature            | 139          | 0.09           | *** -  | 73             | 0.00           | N.S. + | 118           | 0.01           | *** -  | 534          | 0.01           | *** +  |  |
| Precipitation          | 351          | 0.00           | ** -   | 61             | 0.03           | *** +  | 90            | 0.03           | *** +  | 565          | 0.00           | *** +  |  |
| <b>Within-Year Var</b> | <b>218</b>   | <b>0.06</b>    | ***    | <b>38</b>      | <b>0.10</b>    | **     | <b>0</b>      | <b>0.09</b>    | ***    | <b>0</b>     | <b>0.09</b>    | ***    |  |
| Temperature            | 297          | 0.02           | *** +  | 46             | 0.07           | *** -  | 120           | 0.01           | *** -  | 115          | 0.08           | *** +  |  |
| Precipitation          | 254          | 0.04           | *** -  | 47             | 0.07           | *** -  | 16            | 0.08           | *** -  | 243          | 0.06           | *** +  |  |
| <b>Among-Year Var</b>  | <b>357</b>   | <b>0.00</b>    | N.S.   | <b>74</b>      | <b>0.00</b>    | N.S.   | <b>126</b>    | <b>0.01</b>    | N.S.   | <b>297</b>   | <b>0.05</b>    | ***    |  |
| Temperature            | 356          | 0.00           | N.S. - | 72             | 0.00           | N.S. - | 125           | 0.01           | *** +  | 354          | 0.04           | *** +  |  |
| Precipitation          | 356          | 0.00           | N.S. - | 73             | 0.00           | N.S. - | 136           | 0.00           | N.S. + | 575          | 0.00           | * +    |  |
|                        | Panamanian   |                |        | Saharo-Arabian |                |        | Sino-Japanese |                |        |              |                |        |  |
|                        | $\Delta$ AIC | R <sup>2</sup> | p      | $\Delta$ AIC   | R <sup>2</sup> | p      | $\Delta$ AIC  | R <sup>2</sup> | p      |              |                |        |  |
| Latitude               | 19           | 0.00           | N.S. - | 490            | 0.02           | *** -  | 454           | 0.00           | N.S. + |              |                |        |  |
| <b>Geographic</b>      | <b>5</b>     | <b>0.05</b>    | N.S.   | <b>475</b>     | <b>0.03</b>    | ***    | <b>73</b>     | <b>0.40</b>    | N.S.   |              |                |        |  |
| Absolute Latitude      | 19           | 0.00           | N.S. - | 490            | 0.02           | *** -  | 454           | 0.00           | N.S. + |              |                |        |  |
| Altitude               | 0            | 0.04           | *** +  | 508            | 0.01           | ** +   | 72            | 0.40           | *** -  |              |                |        |  |
| <b>Average Climate</b> | <b>0</b>     | <b>0.06</b>    | ***    | <b>412</b>     | <b>0.07</b>    | ***    | <b>37</b>     | <b>0.43</b>    | ***    |              |                |        |  |
| Temperature            | 19           | 0.06           | *** -  | 494            | 0.01           | *** +  | 152           | 0.33           | *** +  |              |                |        |  |
| Precipitation          | 16           | 0.01           | N.S. + | 497            | 0.01           | *** +  | 54            | 0.41           | *** +  |              |                |        |  |
| <b>Within-Year Var</b> | <b>19</b>    | <b>0.00</b>    | N.S.   | <b>2</b>       | <b>0.28</b>    | N.S.   | <b>0</b>      | <b>0.46</b>    | **     |              |                |        |  |
| Temperature            | 19           | 0.00           | N.S. + | 0              | 0.00           | * -    | 453           | 0.00           | N.S. + |              |                |        |  |
| Precipitation          | 17           | 0.00           | N.S. + | 497            | 0.28           | *** +  | 9             | 0.45           | *** -  |              |                |        |  |
| <b>Among-Year Var</b>  | <b>17</b>    | <b>0.01</b>    | N.S.   | <b>459</b>     | <b>0.04</b>    | ***    | <b>284</b>    | <b>0.21</b>    | ***    |              |                |        |  |
| Temperature            | 18           | 0.00           | N.S. - | 497            | 0.01           | *** +  | 285           | 0.00           | N.S. - |              |                |        |  |
| Precipitation          | 16           | 0.00           | N.S. + | 463            | 0.03           | *** -  | 451           | 0.20           | *** -  |              |                |        |  |

2

3

1 **Table S4**

Supplementary Table 4: Comparison of spatial autocorrelation regressions across zoogeographic regions (citation). Significance level is indicated by asterices (N.S. > 0.05, \* < 0.05, \*\* < 0.01, \*\*\* < 0.001). Direction of relationship is indicated by a + for a positive relationship, and a - for a negative relationship. Best-fit multivariate models are shaded in light grey, and best-fit predictor variables are shaded in a darker grey.

|                        | Afrotropics  |       |      | Australian     |       |      | Madagascan    |      |      | Nearctic     |       |     |
|------------------------|--------------|-------|------|----------------|-------|------|---------------|------|------|--------------|-------|-----|
|                        | $\Delta$ AIC | z     | p    | $\Delta$ AIC   | z     | p    | $\Delta$ AIC  | z    | p    | $\Delta$ AIC | z     | p   |
| Latitude               | 1548         | -22.5 | **   | 16.35          | -17   | ***  | 21.32         | -2.5 | *    | 401.7        | 9.7   | *** |
| <b>Geographic</b>      | <b>377</b>   |       |      | <b>1.25</b>    |       |      | <b>0</b>      |      |      | <b>385</b>   |       |     |
| Absolute Latitude      | 391          | -35.2 | ***  | 16.35          | 17    | ***  | 21.32         | 2.5  | *    | 401.7        | 9.7   | *** |
| Altitude               | 1540         | -4.25 | ***  | 126.9          | -2.4  | *    | 2.197         | 5.3  | ***  | 476.1        | -4.2  | *** |
| <b>Average Climate</b> | <b>853</b>   |       |      | <b>0</b>       |       |      | <b>10.4</b>   |      |      | <b>255</b>   |       |     |
| Temperature            | 1522         | 6     | ***  | 1.46           | -16.7 | ***  | 15.74         | -3.6 | ***  | 343.2        | -12.5 | *** |
| Precipitation          | 957          | 12.9  | ***  | 131.8          | 0.8   | N.S. | 23.27         | -2   | *    | 296.1        | -14.3 | *** |
| <b>Within-Year Var</b> | <b>0</b>     |       |      | <b>0.8</b>     |       |      | <b>7.07</b>   |      |      | <b>0</b>     |       |     |
| Temperature            | 71           | -46.1 | ***  | 131.1          | -1.2  | N.S. | 18.05         | 3.1  | **   | 173          | 18.5  | *** |
| Precipitation          | 560          | 23.8  | ***  | 29.84          | -12.2 | ***  | 19.1          | 3    | **   | 263.5        | 17.8  | *** |
| <b>Among-Year Var</b>  | <b>991</b>   |       |      | <b>102</b>     |       |      | <b>7.27</b>   |      |      | <b>311</b>   |       |     |
| Temperature            | 1011         | 0.63  | N.S. | 101.6          | -13.2 | ***  | 12.56         | 4.1  | ***  | 367.3        | 11.4  | *** |
| Precipitation          | 992          | -14.7 | ***  | 117.2          | -4    | ***  | 27.02         | 0.7  | N.S. | 440.5        | 10.8  | *** |
|                        | Neotropic    |       |      | Oceanian       |       |      | Oriental      |      |      | Palearctic   |       |     |
|                        | $\Delta$ AIC | z     | p    | $\Delta$ AIC   | z     | p    | $\Delta$ AIC  | z    | p    | $\Delta$ AIC | z     | p   |
| Latitude               | 0            | -14.2 | ***  | 42.67          | 0.8   | N.S. | 53            | -1.3 | N.S. | 237.4        | -16.5 | *** |
| <b>Geographic</b>      | <b>24.2</b>  |       |      | <b>14</b>      |       |      | <b>52</b>     |      |      | <b>206.5</b> |       |     |
| Absolute Latitude      | 49.7         | 12.9  | ***  | 14.68          | -7.3  | ***  | 55            | 0    | N.S. | 239.4        | -16.5 | *** |
| Altitude               | 155          | -3.6  | ***  | 41.47          | 1.4   | N.S. | 51            | -2.1 | *    | 486.4        | -3    | **  |
| <b>Average Climate</b> | <b>129.1</b> |       |      | <b>16.7</b>    |       |      | <b>53</b>     |      |      | <b>296.9</b> |       |     |
| Temperature            | 128          | -7.8  | ***  | 43.26          | 0.3   | N.S. | 55            | -0.3 | N.S. | 335          | 12.9  | *** |
| Precipitation          | 166.4        | -1.2  | N.S. | 14.79          | 5.5   | ***  | 51            | 2.1  | *    | 428.8        | 8.2   | *** |
| <b>Within-Year Var</b> | <b>109</b>   |       |      | <b>0.75</b>    |       |      | <b>34</b>     |      |      | <b>347.8</b> |       |     |
| Temperature            | 147.8        | 5.1   | ***  | 31.21          | -3.6  | ***  | 54            | 0.7  | N.S. | 353.9        | 12    | *** |
| Precipitation          | 129.6        | -6.3  | ***  | 0              | -6.8  | ***  | 35            | -6   | ***  | 482.3        | 3.7   | *** |
| <b>Among-Year Var</b>  | <b>168.4</b> |       |      | <b>30.1</b>    |       |      | <b>0</b>      |      |      | <b>0</b>     |       |     |
| Temperature            | 166.7        | -1    | N.S. | 29.11          | -3.9  | ***  | 10            | 6.8  | ***  | 37.1         | 22.4  | *** |
| Precipitation          | 167.7        | 0.2   | N.S. | 40.74          | -1.6  | N.S. | 40            | 3.9  | ***  | 481          | 3.8   | *** |
|                        | Panamanian   |       |      | Saharo-Arabian |       |      | Sino-Japanese |      |      |              |       |     |
|                        | $\Delta$ AIC | z     | p    | $\Delta$ AIC   | z     | p    | $\Delta$ AIC  | z    | p    | $\Delta$ AIC | z     | p   |
| Latitude               | 19.18        | -1.2  | N.S. | 156.3          | 2     | *    | 24.27         | -8.5 | ***  |              |       |     |
| <b>Geographic</b>      | <b>1.99</b>  |       |      | <b>148</b>     |       |      | <b>0</b>      |      |      |              |       |     |
| Absolute Latitude      | 19.18        | -1.2  | N.S. | 156.3          | 2     | *    | 24.27         | -8.5 | ***  |              |       |     |
| Altitude               | 0.63         | 4.5   | ***  | 150            | -3.2  | **   | 84.95         | 3.6  | ***  |              |       |     |
| <b>Average Climate</b> | <b>0</b>     |       |      | <b>148</b>     |       |      | <b>63.1</b>   |      |      |              |       |     |
| Temperature            | 1.04         | -4.5  | ***  | 146.3          | 3.7   | ***  | 87.69         | 2.5  | *    |              |       |     |
| Precipitation          | 15.54        | 2.2   | *    | 156.3          | -1.9  | N.S. | 65.85         | 5.6  | ***  |              |       |     |
| <b>Within-Year Var</b> | <b>14.83</b> |       |      | <b>0</b>       |       |      | <b>13.2</b>   |      |      |              |       |     |
| Temperature            | 20.42        | -0.3  | N.S. | 159.8          | -0.6  | N.S. | 87.58         | -2.2 | *    |              |       |     |
| Precipitation          | 12.86        | 2.8   | **   | 2.33           | 12.9  | ***  | 11.63         | -10  | ***  |              |       |     |
| <b>Among-Year Var</b>  | <b>16.96</b> |       |      | <b>162</b>     |       |      | <b>30.6</b>   |      |      |              |       |     |
| Temperature            | 18.69        | 1.4   | N.S. | 159.9          | -0.4  | N.S. | 92.19         | 0.1  | N.S. |              |       |     |
| Precipitation          | 18.36        | 1.5   | N.S. | 160            | 0.3   | N.S. | 35.5          | -7.7 | ***  |              |       |     |

A

bioRxiv preprint doi: <https://doi.org/10.1101/012138>; this version posted December 4, 2014. The copyright holder for this preprint (which was not certified by peer review) is the author/funder, who has granted bioRxiv a license to display the preprint in perpetuity. It is made available under aCC-BY-NC-ND 4.0 International license.

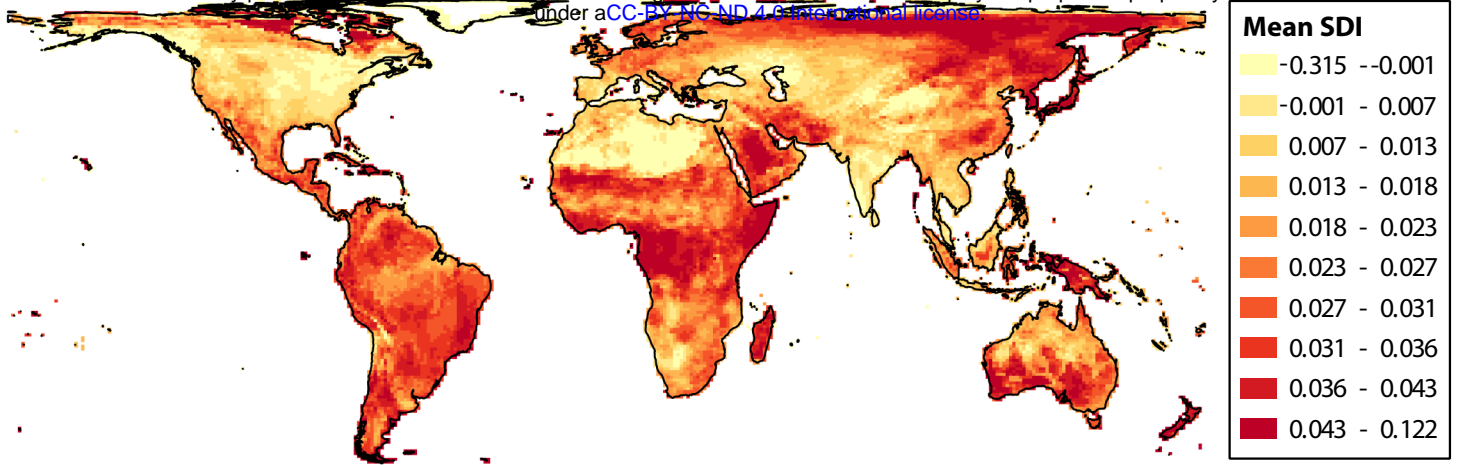

B

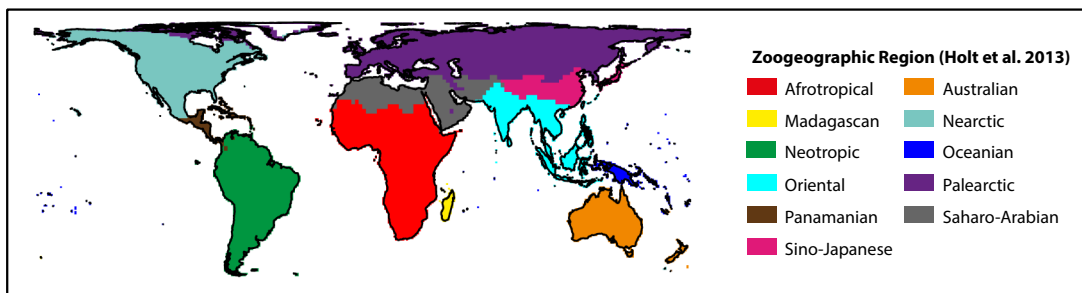

C

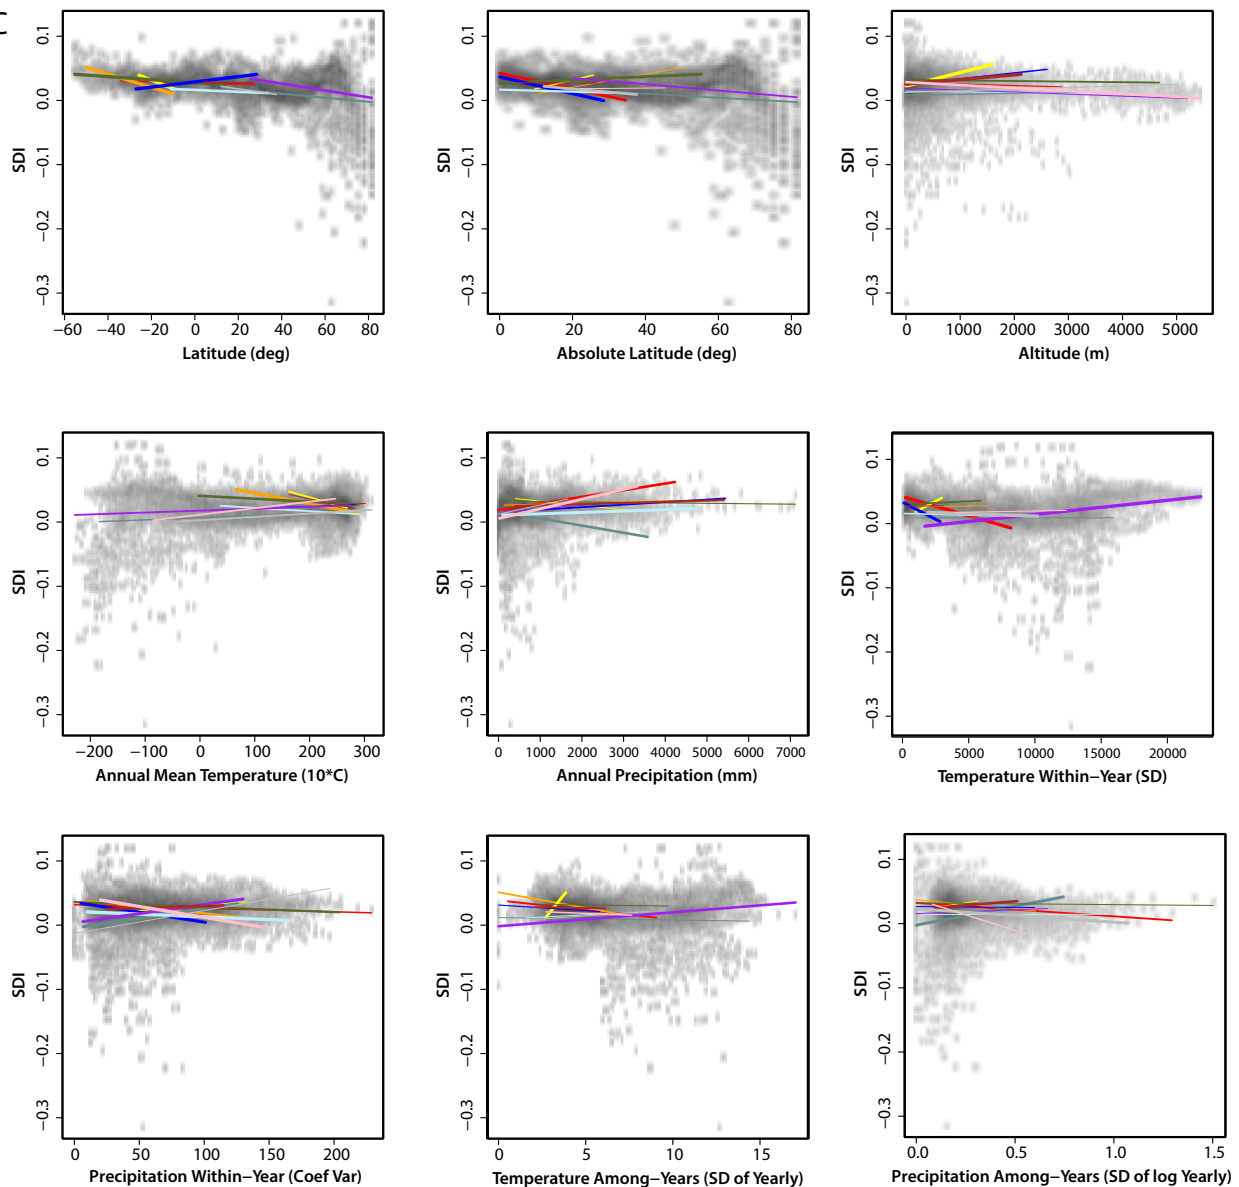

**A**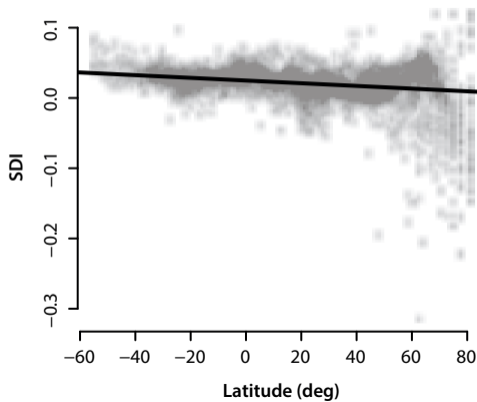**B**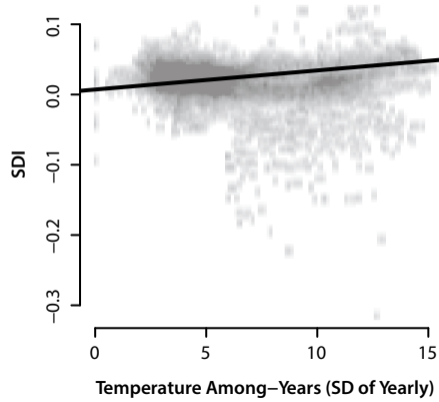**C**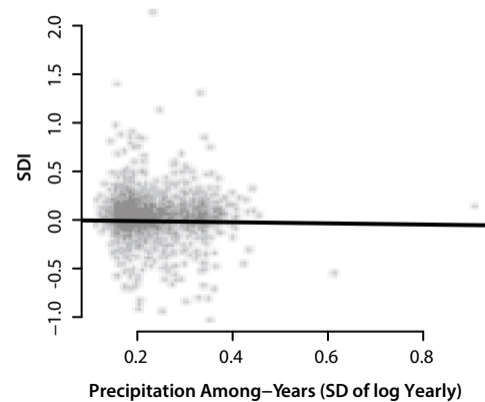

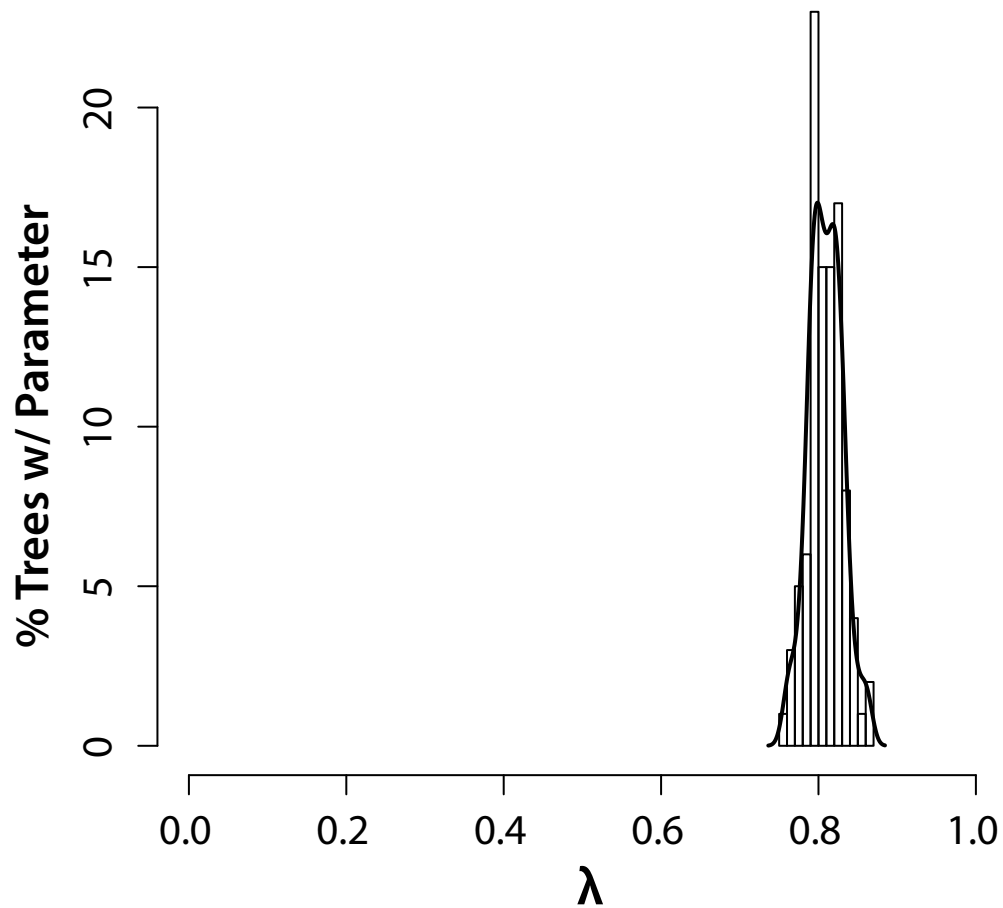

Source: http://biorxiv.org/content/10.1101/012138v1.full.pdf
